# 1 Feedback inhibition and its control in an insect olfactory circuit

2

3 **Authors:** Subhasis Ray, Zane N. Aldworth and Mark A. Stopfer\*

4 **Author affiliation:** Section on Sensory Coding and Neural Ensembles, NICHD, NIH,

5 Bethesda, Maryland 20892 USA

## 6 Abstract

7 Inhibitory neurons play critical roles in regulating and shaping olfactory responses in  
8 vertebrates and invertebrates. In insects, these roles are performed by relatively few  
9 neurons that can be interrogated efficiently, revealing fundamental principles of olfactory  
10 coding. Here, with electrophysiological recordings from the locust and a large-scale  
11 biophysical model, we analyzed the properties and functions of GGN, a unique giant  
12 GABAergic neuron that plays a central role in structuring olfactory codes in the locust  
13 mushroom body. Analysis of our *in vivo* recordings and simulations of our model of the  
14 olfactory network suggests that GGN extends the dynamic range of KCs, and leads us to  
15 predict the existence of a yet undiscovered olfactory pathway. Our analysis of GGN's  
16 intrinsic properties, inputs, and outputs, *in vivo* and *in silico*, reveals basic new properties of  
17 this critical neuron and the olfactory network that surrounds it.

## 18 Introduction

19 Olfactory information is transformed dramatically as it travels from the periphery to higher  
20 order brain centers. Multiple types of olfactory receptor neurons may respond to a given odor  
21 with vigorous bursts of action potentials, while neurons deeper in the brain, in the pyriform  
22 cortex (vertebrates) or mushroom body (insects), may respond to the same odor with only a  
23 spike or two (Bathellier, Buhl, Accolla, & Carleton, 2008; Cang & Isaacson, 2003; Friedrich &  
24 Laurent, 2001; Laurent & Naraghi, 1994; Perez-Orive et al., 2002; Poo & Isaacson, 2009). In

---

\* Correspondence: stopferm@mail.nih.gov

25 these higher order neurons, information about odors is represented sparsely by the identities  
26 of the active neurons (population coding) and in the timing of the few spikes elicited in those  
27 neurons (temporal coding)(Gupta & Stopfer, 2014; Perez-Orive et al., 2002; Poo & Isaacson,  
28 2009; Stettler & Axel, 2009). Many studies in vertebrates and invertebrates suggest that  
29 multiple mechanisms interact to mediate these transformations, including important inhibitory  
30 contributions from GABAergic neurons(Large et al., 2018; Large, Vogler, Mielo, & Oswald,  
31 2016; Lin, Bygrave, de Calignon, Lee, & Miesenböck, 2014; Luna & Pettit, 2010; Palmer &  
32 Harvey, 2014; Papadopoulou, Cassenaer, Nowotny, & Laurent, 2011). Here, with  
33 intracellular recordings and a new large-scale biophysical model that includes tens of  
34 thousands of neurons and spans multiple layers of olfactory processing, we focus on a  
35 singularly important inhibitory neuron to investigate the roles of input activity and feedback  
36 inhibition in creating a sparse spatio-temporal odor representation in a higher order brain  
37 center. Together, our recordings and models point to new functions, neural connectivity  
38 patterns, and mechanisms that underlie transformations in the format of olfactory  
39 information.

40 The locust olfactory system is tractable owing to its relative simplicity and is well studied. At  
41 rest, olfactory receptor neurons (ORNs) are spontaneously active, evoking spontaneous  
42 activity in the antennal lobe's projection neurons (PNs; Figure 1a)(Joseph, Dunn, & Stopfer,  
43 2012). Odorants can increase or decrease the firing rates of ORNs, and odor-elicited spikes  
44 arise in patterns that can include periods of excitation and inhibition that vary with the odor.  
45 The heterogeneous responses of ORNs drive firing patterns in PNs that are further shaped  
46 by inhibition from the antennal lobe's local interneurons (LN)(Raman, Joseph, Tang, &  
47 Stopfer, 2010). Spikes in PNs are also coaxed into rhythmic waves by fast reciprocal  
48 interactions between excitatory PNs and inhibitory LNs(Bazhenov et al., 2001; MacLeod &  
49 Laurent, 1996). Odor-elicited firing patterns distributed across the population of PNs are  
50 informative about the identity, concentration, and timing of the odor(Brown, Joseph, &  
51 Stopfer, 2005; Laurent, Wehr, & Davidowitz, 1996; Stopfer, Jayaraman, & Laurent, 2003).

52 This information is carried by PNs to the mushroom body and the lateral horn. Within the  
53 mushroom body, the primary neurons are Kenyon cells (KCs). Unlike the volubly spiking  
54 PNs, the KCs are nearly silent at rest and respond very selectively to odors with very few  
55 spikes(Joseph et al., 2012; Laurent & Naraghi, 1994; Perez-Orive et al., 2002). Thus, any  
56 given odor evokes responses in a small fraction of the KC population, and any KC responds  
57 to a small set of odors(Perez-Orive et al., 2002; Stopfer et al., 2003). This sparseness of  
58 activity in KCs is thought to arise mainly from two factors: specialized membrane  
59 conductances that imbue them with high firing thresholds; and a feedback circuit that tamps  
60 down their spiking with cyclic inhibition(Demmer & Kloppenburg, 2009; Lin et al., 2014;  
61 Papadopoulou et al., 2011; Perez-Orive et al., 2002). In the locust the main source of this  
62 inhibition is the giant GABAergic neuron (GGN), one on each side of the brain(Gupta &  
63 Stopfer, 2012; Leitch & Laurent, 1996; Papadopoulou et al., 2011).

64 GGN spans much of each brain hemisphere and branches very widely (Figure 1a). It is  
65 reported to receive excitatory input from all 50,000 KCs at synapses within the mushroom  
66 body's  $\alpha$  lobe and, in turn, provide inhibitory feedback to all KCs 400-500 microns away  
67 within the calyx. In addition, GGN receives inhibitory input from a spiking neuron aptly  
68 named "Inhibitor of GGN" (IG) which itself receives inhibition from GGN (Figure 1a,  
69 right)(Papadopoulou et al., 2011). GGN is a non-spiking interneuron. Odor presentations,  
70 spiking in KCs, and intracellular current injections have all been shown to depolarize GGN,  
71 but none of these stimuli causes GGN to generate spikes; even large depolarizations  
72 induced by strong intracellular current injections lead only to passive depolarizing  
73 responses(Leitch & Laurent, 1996; Papadopoulou et al., 2011) (also our own observations).

74 GGN's structure is likely an important factor in its function. GGN is very large, and along its  
75 path from the  $\alpha$  lobe to the calyx, its initially thick processes divide at myriad branch points  
76 into vanishingly thin fibers. Cable theory applied to neurons(Rall, 1964) predicts that a  
77 passive voltage signal within such a structure will attenuate dramatically as it encounters  
78 cytosolic resistance along the neurites, will attenuate further as it divides at the neuronal

79 arbor's branch points, and will leak out through ionic channels in the cell membrane.  
80 Together, these features made it unclear whether this giant neuron has the biophysical  
81 capacity to perform its suggested function of carrying effective signals passively from the  $\alpha$   
82 lobe to distant points in the calyx. Prior studies in invertebrates have shown that 2-5 mV  
83 depolarizations in nonspiking interneurons can evoke change in membrane potential of their  
84 post-synaptic neurons (Burrows & Siegler, 1978; Manor, Nadim, Abbott, & Marder, 1997). If  
85 the signal through GGN attenuates to the extent that it cannot elicit responses in KCs then  
86 GGN must operate through a different mechanism, perhaps purely through local interactions  
87 in the calyx. To test these ideas, we developed a realistic computational model of GGN to  
88 characterize signal attenuation along this pathway. Our model showed that, although  
89 electrical signals undergo substantial attenuation throughout its structure, signals in GGN's  
90 calyceal branches appear strong enough to provide global inhibition to KCs.

91 To further understand the network determinants of GGN's responses to odors, we recorded  
92 from it *in vivo* while delivering a variety of odors to the animal, and then used our large-scale  
93 model to investigate the types of network activity needed to generate these patterns. We  
94 identified three novel features in the olfactory network. First, to generate the types of  
95 membrane potential patterns we observed in GGN, the synaptic connection strengths onto  
96 KCs must be heterogeneous. Second, and surprisingly, our model predicted that a small  
97 portion of KCs must respond to odors with relatively high spike rates. We tested this  
98 prediction *in vivo* with patch clamp recordings from many KCs while presenting odors to the  
99 animal's antenna. Indeed, we found that the predicted portion of KCs responded to odors  
100 with relatively high rates of spiking. Third, our *in vivo* recordings of GGN revealed novel,  
101 complex response patterns not previously documented, including periods of  
102 hyperpolarization, that vary with the odorant. Although GGN receives reciprocal feedback  
103 from IG (Papadopoulou et al., 2011), the periods of hyperpolarization could not be explained  
104 by disinhibition of IG from GGN. Instead, our model predicts that this behavior could arise if,



105 in addition to receiving input from GGN, IG also receives direct excitation from another,  
106 unknown odor-activated pathway.

107 Together, the results of our *in vivo* recordings and large-scale realistic computational  
108 modeling provide a more complete understanding of how different parts of the olfactory  
109 system interact. To generate odor-specific temporally patterned responses in GGN and in  
110 the mushroom body, temporally-patterned odor evoked excitation from PNs, feedback  
111 inhibition from GGN, and inhibition of GGN by odor-driven IG must all cooperate. Further, to  
112 sustain adequate activity in GGN, some KCs must respond to odors with relatively high spike  
113 rates.

## 114 Results

### 115 GGN morphology

116 A valuable use of computational modeling is to answer questions about biological systems  
117 that are too large, complex, or difficult to address by direct physiological investigation. Earlier  
118 computational studies of the insect olfactory system used relatively simple models of  
119 neurons such as integrate and fire or map-based models that collapse entire neuronal  
120 structures into a single point (Arena, Calí, Patané, Portera, & Strauss, 2015; Kee, Sanda,  
121 Gupta, Stopfer, & Bazhenov, 2015; Papadopoulou et al., 2011; Peng & Chittka, 2017; Perez-  
122 Orive, Bazhenov, & Laurent, 2004). However, GGN's giant size, elaborate branching, and  
123 passive membrane properties raised questions about its function that could only be  
124 addressed by considering properties determined by its morphology. Thus, to understand  
125 how the size and shape of GGN affects electrical signal propagation, we constructed a  
126 detailed morphological model of GGN (available at [neuromorpho.org](http://neuromorpho.org)).

127 To reconstruct the morphology of GGN we first made intracellular recordings from it *in vivo*,  
128 filled it with dye, and obtained 3D confocal images of the dye-filled cell (Figure 1a, left; Video  
129 S1). As previously shown, GGN has a reliable and unique location and morphology (Gupta &  
130 Stopfer, 2012; Leitch & Laurent, 1996; Papadopoulou et al., 2011). Its soma is on the ventral

131 side of the brain, just anterior to the optic nerve. A single neurite emerges from GGN's soma,  
132 travels toward the posterior and dorsal side of the brain, and splits there into two branches,  
133 one innervating the  $\alpha$  lobe and the other the mushroom body. Extending outward, these  
134 branching neurites expand in width, becoming much thicker than the primary neurite. The  
135 mushroom body branch further divides into two thick processes that innervate the medial  
136 and the lateral calyx. A thin neurite emerging from the lateral calyceal branch loops back to  
137 the lateral horn, close to the soma, and splits there into many branches. We further observed  
138 for the first time myriad thin fibers that emerge from the stems of the calyceal branches and  
139 split into very fine feather-like neurites that wrap densely around the peduncle, with some  
140 investing the peduncle core (Figure 1b). The neurites in the calyx and lateral horn are dotted  
141 with many irregular bouton-like structures (Figure 1c) whereas the branches in  $\alpha$  lobe are  
142 relatively smooth (Figure 1d).

143 In two animals we traced and reconstructed the morphology of GGN from confocal image  
144 stacks (Figure 1e). Analyzing these traces, we found that the maximum path length (i.e., the  
145 maximum distance between any two points on the neuronal tree when traversed along the  
146 neurites) of the neuronal trees was on the order of 2mm, and the maximum physical length  
147 (i.e., Euclidean distance between any two points on the neuron in three-dimensions) was on  
148 the order of 1mm. Some neurites at their thickest were nearly 20 $\mu$ m in diameter. Total traced  
149 branch length (i.e., the sum of the lengths of all the neurites) was about 65mm (although  
150 many vanishingly thin branches were too fine to trace). Compared to 96,831 vertebrate and  
151 invertebrate neurons cataloged in the neuromorpho.org database, GGN fell into the 99.75<sup>th</sup>  
152 percentile for total branch length, and the 99.95<sup>th</sup> percentile for number of branch points. It is  
153 a really big neuron.

## 154 Signal attenuation in GGN

155 To investigate GGN's electrical properties we constructed a passive electrical model cell by  
156 transferring the morphology tracings of the two GGNs into the NEURON

157 simulator(Carnevale & Hines, 2006). Both models produced qualitatively similar results; the  
158 model we describe here was derived from the second neuron we traced because it was  
159 imaged at higher resolution. To account for branches and changes in the diameters of  
160 processes that affect electrotonic distance we segmented the model GGN into 5,283  
161 compartments. We set the membrane resistivity in the model to 33 kohm-cm<sup>2</sup> based on  
162 published data obtained from other non-spiking neurons in the locust(Laurent, 1991), the  
163 specific membrane capacitance to 1 μF/cm<sup>2</sup>, the approximate value for cell  
164 membranes(Curtis & Cole, 1938; Gentet, Stuart, & Clements, 2000; Hodgkin & Huxley,  
165 1952) and the cytoplasmic resistivity to 100 ohm-cm, a typical order-of-magnitude value for  
166 neurons(Hodgkin & Rushton, 1946; Roth & Häusser, 2001; Stuart & Spruston, 1998).

167 Feedback signals are thought to travel passively from GGN's α lobe branch to its calyceal  
168 branches. To test the extent of passive signal attenuation through GGN's structure, we first  
169 simulated voltage clamping the base of the α lobe branch of the GGN model (Figure 2a).  
170 Intracellular recordings(Papadopoulou et al., 2011) (and our own) show GGN's membrane  
171 potential rests at about -51 mV. Because strong odor stimuli depolarize GGN by about 10  
172 mV in recordings made near the base of the α lobe branch(Papadopoulou et al., 2011) (also  
173 see Figure 5a) we first stepped the clamp voltage to -40 mV and after holding it there for 450  
174 ms measured the resulting depolarizations throughout the model GGN (Figure 2a inset).  
175 Notably, the extent of signal attenuation was substantial and varied throughout the calyx with  
176 depolarizations ranging from ~5 - 9 mV. The signal decreased with branch distance from the  
177 α lobe, leaving the least amount of signal at the medial portion of the lateral calyceal branch  
178 (Figure 2b, c, Video S2).

179 Since excitatory input typically arrives in GGN from many KCs, we then tested a more  
180 realistic form of simulated input to the α lobe arbor of GGN by providing nonhomogeneous  
181 Poisson spike trains through 500 excitatory model synapses; each synapse had a maximum  
182 rate of 20 spikes/s that ramped down linearly to 0 over a 500 ms interval (Figure 2d, e). This

183 stimulus set was calibrated to generate a peak depolarization in the thick branches of GGN  
184 in the same range we observed *in vivo*. This test also revealed significant attenuation of  
185 voltage in the neuron's distant branches (Figure 2e, f).

186 For GGN neither membrane resistivity (RM) nor cytoplasmic (axial) resistivity (RA) has been  
187 measured definitively; yet, for a given morphology, these two parameters determine signal  
188 attenuation. Thus, we explored a range of values for these two parameters with the voltage  
189 clamp simulation approach shown in Figure 2a. We based the RM value range on data  
190 obtained from many types of neurons provided by the neuroelectro.org database. For RA,  
191 neurophysiological data is sparse, so we explored broadly around the range of published  
192 values (Hodgkin & Rushton, 1946; Roth & Häusser, 2001; Stuart & Spruston, 1998). As  
193 expected, higher RA yielded greater signal attenuation, whereas higher RM yielded less  
194 signal attenuation (Figure 2g). This analysis showed that signal transmission in GGN is  
195 robust; except for the most extreme values of this parameter range, signals from the  $\alpha$  lobe  
196 remained strong enough to support synaptic transmission in the calyx. Depolarization  
197 throughout GGN's calyceal arbor varied with location, as quantified in the extended lower  
198 lobe in the violin plots in Figure 2c, f and g.

199 Branches of GGN receiving weaker signals would be expected to provide less inhibition to  
200 their postsynaptic KCs. In a simplified model in which all KCs were strongly stimulated by  
201 identical input from PNs, the amount of KC spiking was indeed negatively correlated with  
202 local GGN voltage deflections (Figure S3). However, in a more realistic model of the  
203 mushroom body network including variable excitatory input from PNs and variable strengths  
204 of inhibitory synapses between GGN and KCs, we found the negative correlation between  
205 depolarizations measured at presynaptic locations throughout GGN and postsynaptic KC  
206 activity was small, and likely negligible (data not shown). This suggests GGN's inhibitory  
207 output has a surprisingly uniform influence upon KCs regardless of their locations.

## 208 Feedback inhibition expands the dynamic range of KCs

209 Feedback inhibition from GGN sparsens the odor-elicited responses of KCs by increasing  
210 the KC spiking threshold and by restricting KC spiking to brief temporal windows defined by  
211 the oscillatory cycle established in the AL(Gupta & Stopfer, 2014; Papadopoulou et al.,  
212 2011). Large-scale feedforward inhibition has previously been shown to expand the dynamic  
213 range of cortical neurons(Pouille, Marin-Burgin, Adesnik, Atallah, & Scanziani, 2009).  
214 Whether feedback inhibition from GGN has a similar effect on KCs is unknown. To test this,  
215 we expanded our model to include, for simplicity, a single KC receiving feedback inhibition  
216 from GGN (Figure 3a). To simulate the KC in this test we used a single compartmental  
217 model with Hodgkin-Huxley type ion channels(Wüstenberg et al., 2004). Since just one KC  
218 would have negligible effects on GGN, we applied its spiking output to GGN's  $\alpha$  lobe branch  
219 via 50,000 synapses, each with random delays between 0 and 60ms. Thus, after each spike  
220 generated by the model KC, GGN received 50,000 EPSPs spread over a 60ms time window.  
221 We drove the KC model with a range of tonic current injections and compared its responses  
222 to those of an isolated KC model receiving the same input without feedback inhibition. As  
223 expected, feedback inhibition increased the KC's threshold for spiking. Notably, though, the  
224 GGN-coupled KC continued to spike over a much larger range of current injection than the  
225 isolated KC, which quickly saturated to a level where it could no longer spike (Figure 3b, c).  
226 This result suggests that feedback inhibition from GGN allows an individual KC to function  
227 effectively over a larger dynamic range of inputs.

## 228 GGN responses can be complex, including hyperpolarization

229 Our recordings made *in vivo* from GGN frequently revealed depolarizations lasting  
230 throughout an odor presentation, often with additionally depolarizing peaks corresponding to  
231 the onset and offset of the odor (Figure 4, Animal 1, hexanol) (see also(Papadopoulou et al.,  
232 2011)). Notably, our recordings from GGN also revealed more complex odor-elicited  
233 responses than previously reported, including combinations of depolarization and  
234 hyperpolarization (Figure 4, Animal 1, hexanal). Moreover, we found that the same GGN

235 could respond differently when different odors were presented; for example, GGNs from  
236 Animals 2 and 3 shown in Figure 4 depolarized in response to one odor and hyperpolarized  
237 in response to another. Also, GGNs in different animals could respond differently to the  
238 same odor (Figure 4, hexanal). Almost a quarter of the odor-GGN pairs in our *in vivo*  
239 recordings showed reliable hyperpolarizations at some point in the odor response (40 out of  
240 169). However, earlier computational models(Kee et al., 2015; Papadopoulou et al., 2011)  
241 did not reproduce sustained responses in GGN, nor did they show any hyperpolarization of  
242 GGN. Rather, in those models, odor-driven KCs spiking in synchronous bouts elicited  
243 multiple isolated depolarizing peaks in GGN's membrane potential. To better understand the  
244 mechanisms underlying GGN's odor-elicited responses (and by extension, novel features of  
245 olfactory circuitry), we used our GGN model as the center of a more extensive mushroom  
246 body olfactory network.

#### 247 GGN responses suggest some KCs fire at high rates

248 We extended our detailed GGN model with a full population of 50,000 simulated KCs. KCs  
249 are very small, have few dendritic branches, and generate action potentials; thus, in contrast  
250 to the large, complex, and passive GGN, the morphologies of individual KCs are unlikely to  
251 differentially influence their odor coding properties. Therefore, we used a relatively simple  
252 NEURON version of a single compartmental KC model(Wüstenberg et al., 2004). Each  
253 model KC was connected to GGN in the  $\alpha$  lobe via an excitatory synapse, and each  
254 received inhibitory input from a random segment of GGN in the calyx via a graded synapse  
255 (Figure 5a). To provide excitatory input to the KCs, the firing patterns of 830 PNs were  
256 simulated as spike-trains, each designed to follow the statistics of PNs recorded *in*  
257 *vivo*(Jortner, Farivar, & Laurent, 2007; Mazor & Laurent, 2005). Thus, 77% of the PN spike  
258 trains were assigned a spontaneous firing rate of 2.6 spikes/s; during odor stimulation, 20%  
259 of these PNs were switched to 20 spikes/s modulated by the 20 Hz oscillations generated in  
260 the antennal lobe and reflected in the local field potential (LFP), and 10% were inhibited (no  
261 spikes) (Figure 5b). This resulted in a few highly synchronized bouts of spiking in the KC

262 population (Figure 5c), and corresponding isolated peaks in GGN's membrane potential  
263 (Figure 5d). These unrealistic responses were similar to those generated by the above-  
264 mentioned earlier models.

265 We suspected that more continuous input from KCs could sustain the long-lasting  
266 depolarization in GGN we had observed *in vivo*. In our model all synapses between any two  
267 cell types had the same strength. However, it has been shown *in vivo* that synaptic strengths  
268 follow a lognormal distribution (Buzsáki & Mizuseki, 2014; Loewenstein, Kuras, & Rumpel,  
269 2011; Song, Sjöström, Reigl, Nelson, & Chklovskii, 2005). After adjusting our network model  
270 to include this property, some KCs became weakly inhibited, allowing them to fire more  
271 volubly. Also in our model, input to the KCs emulated a fixed set of PNs constantly active  
272 throughout the duration of the odor stimulus. However, *in vivo*, spiking patterns of PNs  
273 evolve over the course of an odor presentation, and different PNs respond to the same odor  
274 in different ways (Laurent & Davidowitz, 1994; Mazor & Laurent, 2005; Stopfer et al., 2003),  
275 thus activating changing sets of KCs. To simulate these diverse responses, we divided the  
276 model's PN population into five groups: four groups responsive to the stimulus and one  
277 unresponsive. Odor-elicited spiking within each of the responsive groups started in a subset  
278 of its member PNs, and then, in each successive LFP cycle, new PNs were activated (Figure  
279 5e). Lacking the heterogeneity in synaptic strengths onto KCs described above, even this  
280 complex activity pattern in PN population produced unrealistically synchronized bouts of  
281 activity in KCs, resulting in unrealistic isolated peaks in GGN's simulated membrane  
282 potential (Figure 5f). However, we found that combining heterogeneous connectivity with  
283 structured PN firing patterns gave rise to GGN voltage traces that included sustained  
284 depolarization and temporal dynamics more characteristic of responses we had observed *in*  
285 *vivo* (Figure 5g). The distribution of firing rates of the KC population showed that, while most  
286 KCs produced 0-2 odor-elicited spikes, a few KCs spiked much more (Figure 5h). Thus, our  
287 analysis of GGN's voltage profile led us to predict that a few odor responses in KCs are far  
288 more intense.



289 To test this *in vivo*, we made patch clamp recordings from 147 KCs in 114 animals, obtaining  
290 results from 707 KC-odor pairs. On average, the spontaneous firing rates of these KCs were  
291 very low (~0.09 Hz) and reached only somewhat higher rates during and after odor  
292 termination (~0.15 and ~0.16 Hz, respectively, Figure 6a), as previously observed (Gupta &  
293 Stopfer, 2014; Perez-Orive et al., 2002). Notably, though, we also found that some odor-  
294 elicited responses in KCs consisted of many more spikes. Figure 6b shows a representative  
295 example of a hyperactive KC response, in which a 1s odor pulse elicited an average of 7  
296 spikes (Figures 6c and d). Overall, the distribution of spike counts in KCs we tested was  
297 clustered close to 0 but included a long rightward tail (Figure 6e), in striking agreement with  
298 our prediction (Figure 5h). This result expands our view of KC activity to include a broader  
299 range of odor-elicited spiking.

### 300 Odor evoked spiking in IG can explain GGN hyperpolarization

301 Our intracellular recordings from GGN revealed extended periods of odor-elicited  
302 hyperpolarization (Figure 4), something not previously observed nor explainable by existing  
303 models of GGN within its olfactory network. We hypothesized that these periods of  
304 hyperpolarization might originate in the activity of IG, a neuron known to share reciprocal  
305 inhibition with GGN (Figure 1a, right) (Papadopoulou et al., 2011). Specifically, we  
306 hypothesized that an increase in IG activity might underlie the periods of hyperpolarization in  
307 GGN, with IG's activity increase caused by disinhibition from GGN. To test this, we first tried  
308 adding a simple version of IG to our model following the reciprocal connectivity plan shown  
309 in Figure 1a. But, despite testing a broad range of IG properties, this configuration could not  
310 generate odor-elicited hyperpolarization in GGN (data not shown). Something more was  
311 needed.

312 The location and most properties of IG are unknown, and we were not able to identify it in  
313 our recordings. However, a previous report showed spikes in IG correlate one-to-one with  
314 IPSPs in GGN (Papadopoulou et al., 2011), suggesting we could infer IG's activity by  
315 examining GGN's membrane potential. Our recordings made *in vivo* from GGN revealed an

316 odor-elicited increase in the frequency of IPSPs in GGN's membrane potential (Wilcoxon  
317 signed-rank test,  $N=198$  pairs,  $W=2328.5$ ,  $p \ll 0.001$ ); responses from 2 animals are shown  
318 in Figure 7a, and responses from 1257 trials with several odors from 47 GGNs are shown as  
319 a peri-stimulus time histogram in Figures 7b and c. Assuming these IPSPs originate as  
320 spikes in IG(Papadopoulou et al., 2011), these results show that IG is spontaneously active,  
321 and that its responses to an odor pulse are delayed and lengthy. Further, as evident in  
322 Figure 7b, IG's firing rate begins to increase before GGN's membrane potential returns to  
323 baseline, suggesting that IG's odor response cannot be driven by disinhibition from GGN.  
324 Therefore, we hypothesized that IG receives its odor-elicited excitatory synaptic input via a  
325 different odor-driven pathway, for example, from PNs or KCs. Using our model, we could  
326 indeed reproduce realistic hyperpolarization in GGN's membrane potential by adding  
327 excitatory synapses to IG from either the PNs or the KCs (Figures 7d and e). Depending on  
328 the PN activity pattern, our simulations produced GGN membrane potentials with  
329 hyperpolarization and depolarization (Figure 7e-g).

330 A remaining question concerned the source of excitation driving spontaneous activity in IG  
331 (Figure 7h, top black traces). KCs are nearly silent at rest(Gupta & Stopfer, 2014; Perez-  
332 Orive et al., 2002), ruling them out as the sole source of excitation to IG. PNs, though, spike  
333 spontaneously because they receive direct, powerful input from spontaneously active  
334 ORNs(Joseph et al., 2012), suggesting a PN-driven pathway might be responsible for  
335 spontaneous activity in IG. To test this *in vivo*, we completely silenced PNs and KCs by  
336 bilaterally cutting the animal's antennal nerves(Joseph et al., 2012) and then recorded  
337 intracellularly from GGN. We found that spontaneous IPSPs in GGN persisted as normal in  
338 preparations with silenced PNs and KCs (Figure 7h, bottom red traces), demonstrating that  
339 IG's spontaneous spiking either arises intrinsically or is driven by a source other than PNs or  
340 KCs.

## 341 Discussion

342 Inhibitory neurons play critical roles in regulating and shaping olfactory responses in  
343 vertebrates and invertebrates (Kay & Stopfer, 2006). In insects, these roles are performed by  
344 relatively few neurons that can be interrogated efficiently, revealing fundamental principles of  
345 olfactory coding. The unique giant GABAergic neuron GGN plays a central role in structuring  
346 olfactory codes in the locust mushroom body by regulating the excitability of KCs and  
347 parsing their responses into rhythmic bursts. We combined intracellular recordings from  
348 GGN and KCs, and developed a new morphologically detailed model of GGN as a focus of  
349 analysis to investigate GGN's properties, inputs, and outputs. Further, we used a broader  
350 model of the olfactory system built around GGN to explore several basic properties of the  
351 olfactory network. Our new electrophysiological recordings and computational model  
352 successfully reproduced the sparse activity of KCs and the membrane dynamics of GGN in  
353 the locust brain while providing concrete hypotheses about how the mushroom body circuit  
354 may process odor information.

355 Non-spiking interneurons in insects are often large with complex splays of neurites in  
356 separate brain areas, suggesting their far-flung branches may be functionally isolated,  
357 serving separate local computations (Burrows, 1981). It has been proposed that signals  
358 generated within GGN's  $\alpha$  lobe branch propagate to its calyceal branch, where they transmit  
359 global inhibition to all KCs (Papadopoulou et al., 2011). But, the enormous size, extensive  
360 branching, and passive conduction characterizing GGN raised the hypothesis that GGN's  $\alpha$   
361 lobe signals would attenuate to such an extent as they travel to the calyx that they would be  
362 unable to effectively inhibit KCs. Our simulation of GGN's morphological and electrical  
363 properties suggests that realistic levels of depolarizations of 10mV in GGN's  $\alpha$  lobe branch  
364 do indeed attenuate greatly with distance to amplitudes as low as 5mV in parts of the calyx.  
365 However, earlier studies of non-spiking neurons in invertebrates showed depolarizations of  
366 this amplitude should suffice to evoke neurotransmitter release. For example, (Burrows &  
367 Siegler, 1978) showed that depolarizations of only about 2 mV in a non-spiking interneuron

368 in the metathoracic ganglion of the locust suffices to change the firing rate of its postsynaptic  
369 motor neuron. Similarly, (Manor et al., 1997) showed in a graded synapse in the lobster  
370 stomatogastric ganglion that voltage steps from -50 mV to -45 mV can reliably evoke  
371 postsynaptic effects. Thus, we conclude that input from KCs at GGN's  $\alpha$  lobe branches  
372 could provide effective global inhibition to all KCs in the calyx.

373 GGN's arborizations in the calyx extend different lengths, suggesting signals arising in the  $\alpha$   
374 lobe could attenuate more in some of its calyceal branches than in others. Our simulations  
375 indeed showed the amount of depolarization reaching GGN's distant branches varied with  
376 their locations, but only by a few millivolts (Figure 2b). Perhaps consistent with this, APL, the  
377 *Drosophila* analog of GGN(Lin et al., 2014) appears to provide varying levels of feedback  
378 inhibition to different groups of KCs(Inada, Tsuchimoto, & Kazama, 2017). Odor-elicited  
379 responses of KCs result from non-linear combinations of many factors in addition to the  
380 amount of depolarization reaching presynaptic terminals of GGN; these factors include the  
381 KCs' intrinsic properties, excitatory input from PNs, and the strengths of inhibitory synapses  
382 from GGN. Thus, although we observed variations in the amplitudes of GGN depolarization  
383 in our model's calyceal branches, they did not appear to contribute significantly to variations  
384 in KC excitability. For example, KCs in the medial calyx did not consistently spike more than  
385 KCs in lateral areas.

386 Our model does not address the possibility that local, reciprocal connectivity between GGN  
387 and KCs might occur in the calyx alongside global inhibition. In *Drosophila*, APL is known  
388 from electron microscope image reconstructions to receive synapses from KCs in the calyx,  
389 possibly enabling local feedback(Eichler et al., 2017; Zheng et al., 2018). If KCs make  
390 reciprocal local connections with GGN within the calyx along with convergent connections in  
391 the  $\alpha$  lobe, then the relative influence of global and local inhibition might vary with stimulus  
392 intensity. We speculate that very weak olfactory stimuli that minimally activate KCs will  
393 evoke in the  $\alpha$  lobe branch of GGN only small depolarizations which would attenuate below  
394 threshold upon reaching the calyx. This would allow local inhibition to dominate, consistent

395 with recent observations in the *Drosophila* mushroom body circuit(Inada et al., 2017). In this  
396 local inhibition scenario, a spiking KC would effectively inhibit only its close neighbors via  
397 GGN. Combined with random connectivity from PNs, this circuitry might result in a winner-  
398 take-all, center-surround-type of contrast enhancement in which only the most strongly  
399 driven KCs in each region of GGN's arbor can respond to an odor. On the other hand, in the  
400 case of very strong olfactory stimuli (or in the absence of local KC-GGN reciprocal  
401 connections in the calyx), global inhibition will dominate and KCs receiving inhibition from the  
402 same region of GGN would likely fire together, reducing the contrast among their response.

403 Inhibition from GGN is known to sparsen the firing of KCs and to impose rhythmic time  
404 windows on their responses(Gupta & Stopfer, 2012; Papadopoulou et al., 2011). Notably,  
405 our model also revealed that feedback inhibition from GGN can expand the range of inputs  
406 able to activate KCs (Figure 3). We found our isolated model KCs only generated spikes  
407 when stimulated by a narrow range of current; too little current failed to evoke any response,  
408 and too much current was saturating (Figure 3). In the real brain, a wide range of synaptic  
409 strengths exists even within a given type of neuron, and synaptic strength can change over  
410 time and with experience (reviewed in(Barbour, Brunel, Hakim, & Nadal, 2007)). It is  
411 possible that ionic conductances in KCs are precisely and constantly tuned by homeostatic  
412 mechanisms to match their inputs, enabling them to respond appropriately to a broad and  
413 changing range of inputs (reviewed in(Marder & Goaillard, 2006)). Our results suggest that  
414 feedback inhibition may also help KCs function robustly by expanding their sensitivities to a  
415 wider range of inputs, enabling them to generate consistently sparse responses.

416 Our intracellular recordings from GGN often revealed odor-elicited periods with sustained  
417 depolarization (Figure 4), a response feature unexplainable by existing models. What inputs  
418 underly GGN's membrane potential? KCs, which provide excitation to GGN, have been  
419 shown to respond very sparsely to any given odor, with very few cells firing just one or a few  
420 spikes(Laurent & Naraghi, 1994; Mazor & Laurent, 2005; Perez-Orive et al., 2004). Our  
421 simulations showed that sparse spiking in the entire KC population cannot generate the

422 large sustained depolarizations we observed *in vivo* in GGN. When we adjusted the  
423 excitatory and inhibitory inputs to the KCs to generate a few spikes upon activation of a fixed  
424 set of PNs by odorant, the KC population responded with unrealistically strong bursts of  
425 synchronous activity, resulting in unrealistic prominent peaks in GGN's membrane potential.  
426 Simply increasing the excitability of KCs in a network driven by odor-evoked oscillatory  
427 spiking in a fixed set of PNs succeeded in generating realistic GGN responses, but also  
428 elicited spiking in an unrealistically large number of KCs in the model. We found we could  
429 solve this problem by introducing variability in the strength of the synapses onto KCs (Figure  
430 S4). Further, when we drove KCs with more realistic, heterogeneous patterns of excitatory  
431 input from PNs, the resulting responses of GGN and the KC population generally matched  
432 our observations *in vivo* (Figure 5). Notably, close inspection of the revised model's KC odor  
433 response distribution revealed a small subset of responses with more spiking than had  
434 previously been documented, thus predicting some KC responses *in vivo* are much stronger  
435 than previously reported. Notably, our patch recordings from neurons confirmed to be KCs  
436 by dye fills revealed the predicted distribution of responsiveness (Figure 6e). KCs generating  
437 especially strong responses were not localized in any particular part of the calyx, nor did  
438 they feature distinguishing morphologies (data not shown). It is unclear why hyperactive KC  
439 responses were not previously observed in the locust mushroom body, but one possibility is  
440 that unusually active neurons recorded here (but not filled) were misidentified as other cell  
441 types. This small group of over-active KC responses appears to play a key role in olfactory  
442 processing by driving sustained global inhibition.

443 Our intracellular recordings from GGN also revealed more elaborate membrane potential  
444 temporal dynamics than previously reported, including prolonged stimulus-dependent  
445 periods of hyperpolarization, that varied with odor and animal. In our model, simple  
446 reciprocal inhibition of GGN by the inhibitory neuron IG could not reproduce these features.  
447 Rather, realistic hyperpolarization of GGN's membrane potential could be caused by odor-  
448 elicited activity in the inhibitory neuron IG (Figure 8). The direct source of odor-elicited

449 excitatory drive to IG is unknown, but could, in principle, be traced to KCs. Indeed, a version  
450 of our model in which all KCs synapse upon IG reliably reproduced realistic odor-elicited  
451 hyperpolarizations in GGN. Why are these hyperpolarizations elicited by only some odors in  
452 some animals, as we saw *in vivo* (Figure 4)? Our simulations suggest that odor-specific  
453 temporal pattern in the PN population's response (Stopfer et al., 2003) can explain this  
454 phenomenon (Figure 7e-g).

455 In summary, we used biophysically detailed simulations in combination with *in vivo*  
456 electrophysiology to explore the olfactory circuit in the locust mushroom body. Our  
457 intracellular and patch recordings revealed new features of GGN, a neuron that plays a  
458 central role in shaping olfactory responses, and of the KC population, which we show to  
459 generate a small subset of hyperactive responses, as predicted by our model. These results  
460 extend our understanding of the olfactory system, highlighting ways different components  
461 interact, and providing new predictions for additional research.

## 462 Materials and Methods

### 463 Dissection and electrophysiology

464 Newly eclosed adult locusts of both sexes picked randomly from our crowded colony were  
465 immobilized and the brain was exposed, desheathed and superfused with locust saline as  
466 described before (Brown et al., 2005). No sample size estimation was done beforehand. As  
467 this was an exploratory study and odor response was specific to each GGN and odor, we  
468 tried to collect data from as many animals as we could. We commonly obtained recordings  
469 from one GGN in each animal, mostly one in a day, over a year. The results were similar  
470 months apart. To record from GGN, a sharp glass micropipette filled with 2 or 3M potassium  
471 acetate with 5% neurobiotin was inserted into the peduncle region of the mushroom body;  
472 when impaled, GGN could be identified by its characteristic pattern of IPSPs in the voltage  
473 record (Figure 7h). At the end of the recording session, neurobiotin was injected into the cell



474 iontophoretically using 0.2 nA current pulses at 3 Hz for 10 to 20 minutes, and the cell's  
475 identity was confirmed by subsequent imaging.

476

477 To test whether IPSPs in GGN originate from spontaneous activity in PNs, we first silenced  
478 the PNs by cutting both antennal nerves at the base (Joseph et al., 2012) and then searched  
479 for GGN, which could still be identified by its pattern of IPSPs and by its morphology,  
480 revealed by subsequent filling with neurobiotin and imaging.

481

482 For patch clamp recordings from KCs, the initial dissection was performed as described  
483 above. Patch pipettes were pulled to between 7 and 12 M $\Omega$ , filled with locust internal  
484 solution (Laurent, Seymour-Laurent, & Johnson, 1993) as well as a neural tracer for  
485 subsequent histology (either 12 mM neurobiotin for later conjugation with an Avidin-Alexa  
486 complex, or 20  $\mu$ M Alexa Fluor tracer with absorption wavelengths of 488, 568 or 633).

487 Patch recordings were made in current clamp mode, and data was only analyzed if the  
488 observed membrane potential was within the previously reported range for KCs (-55 to -65  
489 mV) and if either LFP or membrane potential oscillations were observed in response to odor  
490 stimulation. Firing rates were obtained by smoothing the PSTH with a 100 ms SD gaussian  
491 window.

492

### 493 Stimulus delivery

494 For GGN recordings, odor pulses were delivered to the ipsilateral antenna as described in  
495 (Gupta & Stopfer, 2012). The odorants included 1-hexanol at dilutions of 1% v/v, 1-hexanol,  
496 hexanal, methyl benzoate, benzaldehyde, and cyclohexanone mixed at the dilution of 10%  
497 v/v in mineral oil, and 100% mineral oil.

498

499 For KC recordings, the following odors were delivered similarly: 1-hexanol, hexanal,  
500 cyclohexanol, 1-octanol, citral, geraniol, ethyl butyrate, 1-butanol, benzaldehyde, eugenol,

501 3-methyl-2-butenol, methyl jasmonate, decanal, methyl salicylate, linalool, limonene, pentyl  
502 acetate, (all 10% v/v in mineral oil, except methyl salicylate and limonene, at 40% each) and  
503 100% mineral oil.

504

## 505 Histology and immunostaining

506 Brains were dissected from the head capsule and fixed in 4% paraformaldehyde overnight,  
507 then conjugated with Avidin-Alexa 568 or Avidin-Alexa 488. Some brains were first  
508 immunostained with mouse nc82 primary antibody (DSHB Cat# nc82, RRID:AB\_2314866,  
509 deposited to the DSHB by Buchner, E.) and Alexa 568 conjugated anti-mouse IgG  
510 secondary antibody(Shimizu & Stopfer, 2017).

511

## 512 Imaging and neuronal tracing

513 Brains were dehydrated in an ethanol series and cleared with methyl salicylate or  
514 CUBIC(Susaki et al., 2014), mounted in methyl salicylate or mineral oil respectively, and  
515 imaged with a Zeiss LSM 710 confocal microscope. Two GGNs were traced in detail from  
516 3D image stacks using NeuroLucida software (MBF Bioscience, Williston, Vermont). The  
517 traces were converted to SWC format for further processing and cleanup using  
518 NLMorphologyConverter ([www.neuronland.org](http://www.neuronland.org)). The two traces were very similar; the one  
519 obtained at higher resolution was used for reconstruction and modeling.

520

## 521 Statistics

522 For each of 198 GGN-odor pairs, average spike rates were calculated over 5 trials in  
523 windows beginning 2 s before, and 2 s after, odor presentations. Wilcoxon-signed rank tests  
524 from scipy package were used to compute the statistic and the two-sided *p*-value.

525

## 526 Computational model

527 GGN morphologies in SWC format were imported into NEURON and converted into passive  
528 models in NEURON's hoc format. The single compartmental KC model reported by  
529 (Wüstenberg et al., 2004) was translated manually into a NEURON model. The resting  
530 membrane potential was set to -51 mV, as we have observed *in vivo*. The passive reversal  
531 potential of the KCs was set to -70 mV. Custom Python scripts were written to set up  
532 network models and simulation experiments using NEURON's Python interface. The  
533 simulations were run on NIH's Biowulf supercomputer cluster (<http://hpc.nih.gov>) and  
534 simulation results were saved in HDF5 based NSDF format(Ray, Chintaluri, Bhalla, &  
535 Wójcik, 2015) and later analyzed with custom Python scripts.

536

## 537 PN activity model with a fixed responsive population

538 Modeled PN spike train rates were based on firing statistics reported in Figure 2c-e in this  
539 publication:<sup>7</sup> from which we infer 77% of PNs are spontaneously active. Odor presentations  
540 were set to evoke spiking in ~20% of PNs, each spiking at an average rate of 20 Hz(Jortner  
541 et al., 2007; Mazor & Laurent, 2005). A 20 Hz sinusoid with amplitude 0.4 times the average  
542 spiking rate was further superimposed on odor-elicited spiking to model oscillatory activity  
543 generated in the antennal lobe. Based on our own observations *in vivo* we set 10% of  
544 spontaneously active PNs to respond with inhibition to odor presentations. We used a non-  
545 homogeneous Poisson generator to create the spike trains based on these rates.

546

## 547 PN activity model with a shifting responsive population

548 To test the significance of varying temporal structure in PN firing patterns, we assumed  
549 ~30% of the PNs were unresponsive to odors, and divided the other 70% into 4 equally  
550 sized groups with the following odor-elicited sequences of excitation (E) and inhibition (I):  
551 EEI, EIE, IEI and IIE, with the last epoch occurring upon stimulus offset(Laurent &  
552 Davidowitz, 1994). Within each group, excitation epochs featured shifting sets of active PNs,

553 with new PNs recruited during each LFP cycle<sup>7</sup>. Each group started its excitatory epoch with  
554 activation of 70% of its members and 10% were recruited in each of the next three LFP  
555 cycles. In this scheme at most ~30% of PNs were active at any given time during odor  
556 presentations.

557

## 558 Connectivity from GGN to KCs

559 Each KC received one graded inhibitory synaptic input from a randomly assigned point on  
560 GGN's calyceal branches. The strength of each synapse was adjusted to keep the KC's  
561 membrane potential close to -60 mV when bombarded by spontaneous activity from PNs, as  
562 observed *in vivo* (Joseph et al., 2012). The graded synapse was modeled as a NEURON  
563 mechanism based on published descriptions (Manor et al., 1997; Papadopoulou et al., 2011).  
564 In some simulations the individual synaptic conductances were selected from a lognormal  
565 distribution with the mean adjusted to produce realistic KC activity.

566

## 567 Connectivity from PNs to KCs

568 Half of the PN population was randomly and independently selected as presynaptic partners  
569 for each KC. If two subsets of size  $m$  and  $n$  are randomly and independently selected from a  
570 set of size  $q$ , the expected size of their intersection is  $s = m * n / q$ . Thus, with 800 PNs and  
571 each KC receiving input from 400 PNs, the expected number of PNs shared by any two KCs  
572 is  $400 * 400 / 800 = 200$ , i.e., they share about 50% of their presynaptic PNs, as shown *in*  
573 *vivo* (Jortner et al., 2007). In some simulations the synaptic conductances were selected from  
574 a lognormal distribution with the mean adjusted to produce realistic KC activity.

575

576

## 577 IG model and connectivity

578 To simulate IG, we used a single compartmental Izhikevich-type model of a regular spiking  
579 (RS) pyramidal cell from the Model DB repository

580 [<https://github.com/ModelDBRepository/39948>] modified to include graded synaptic input  
581 from GGN. To model IG's spontaneous firing, sufficient current was injected to it to generate  
582 about 7 spikes/s. A single inhibitory synapse with -80 mV reversal potential connected IG to  
583 one of GGN's basal dendrite segments. The strength and time constants for this synapse  
584 were adjusted to produce IPSP amplitudes matching those we observed *in vivo*. The same  
585 GGN segment was connected to IG via a graded synapse. In some simulations either the  
586 output of all PNs or the output of all KCs were connected to IG via excitatory synapses. The  
587 synaptic weights from KCs to IG were selected from a lognormal distribution.

588

## 589 Data Analysis

590 Most analysis and 3D visualization were carried out with custom Python scripts using  
591 published modules including numpy, scipy, networkx, matplotlib, h5py, pandas and  
592 scikitslearn.

593 Analyses of patch clamp recordings from KCs were carried out with custom MATLAB scripts.

594

## 595 Data and Software Availability

596 The morphological reconstruction of GGN will be made publicly available in neuromorpho  
597 repository (<http://neuromorpho.org/>). The morphology, electrophysiology and simulation data  
598 used in this manuscript are available at Dryad (<https://doi.org/10.5061/dryad.f3t3jf0>).

599 The code for setting up and simulating the model is available on request and will be made  
600 publicly available in ModelDB repository (<https://senselab.med.yale.edu/ModelDB/>). Scripts  
601 for data analysis are available at github: [https://github.com/subhacom/mbnet\\_analysis.git](https://github.com/subhacom/mbnet_analysis.git).

602

603 **Acknowledgements:** We thank Tianming Li and Ian McBain for help with tracing GGN  
604 morphology from confocal image stacks, Nitin Gupta (IIT Kanpur, India) for providing a  
605 confocal image stack of GGN for a pilot model and helpful advice for making recordings from

606 GGN. We thank the members of the Stopfer lab for feedback and suggestions and Diantao  
607 Sun and Kui Sun for excellent animal care. We also thank Vincent Schram and Lynn  
608 Holzclaw of the NICHD Microscopy Imaging Core for help with confocal imaging, George  
609 Dold and Bruce Pritchard of NIMH Section on Instrumentation for help with electrophysiology  
610 data acquisition setup, and Theodor Usdin, NIMH/NIH, for suggestions on tissue clearing  
611 and for providing initial reagents for the CUBIC protocol. We thank the Developmental  
612 Studies Hybridoma Bank for the nc82 antibody. This work utilized the computational  
613 resources of the NIH HPC Biowulf cluster. (<http://hpc.nih.gov>). This work was funded by an  
614 intramural grant from NIH-NICHD to M.S.

615 **Author contributions:** S.R. and M.S. designed the study. Z.A. carried out KC  
616 electrophysiology and analyzed data. S.R. carried out GGN electrophysiology, developed  
617 computational models and analyzed data. S.R. and M.S. wrote the manuscript.

618

619 **Competing interests:** The authors declare no competing interests.

620

621

## 622 References

- 623 Arena, P., Calí, M., Patané, L., Portera, A., & Strauss, R. (2015). Modelling the insect  
624 Mushroom Bodies: Application to sequence learning. *Neural Networks*, 67, 37-53.  
625 doi: 10.1016/j.neunet.2015.03.006
- 626 Barbour, B., Brunel, N., Hakim, V., & Nadal, J.-P. (2007). What can we learn from synaptic  
627 weight distributions? *Trends in Neurosciences*, 30(12), 622-629. doi:  
628 10.1016/j.tins.2007.09.005
- 629 Bathellier, B., Buhl, D. L., Accolla, R., & Carleton, A. (2008). Dynamic Ensemble Odor  
630 Coding in the Mammalian Olfactory Bulb: Sensory Information at Different  
631 Timescales. *Neuron*, 57(4), 586-598. doi: 10.1016/j.neuron.2008.02.011
- 632 Bazhenov, M., Stopfer, M., Rabinovich, M., Abarbanel, H. D. I., Sejnowski, T. J., & Laurent,  
633 G. (2001). Model of Cellular and Network Mechanisms for Odor-Evoked Temporal  
634 Patterning in the Locust Antennal Lobe. *Neuron*, 30(2), 569-581. doi: 10.1016/S0896-  
635 6273(01)00286-0
- 636 Brown, S. L., Joseph, J., & Stopfer, M. (2005). Encoding a temporally structured stimulus  
637 with a temporally structured neural representation. *Nature Neuroscience*, 8(11),  
638 1568-1576. doi: 10.1038/nn1559
- 639 Burrows, M. (1981). Local interneurons in insects. In A. Roberts & B. M. H. Bush (Eds.),  
640 *Neurons without impulses: (1 ed., pp. 199-221): Cambridge University Press.*



- 641 Burrows, M., & Siegler, M. V. (1978). Graded synaptic transmission between local  
642 interneurons and motor neurons in the metathoracic ganglion of the locust. *The*  
643 *Journal of Physiology*, 285(1), 231-255. doi: 10.1113/jphysiol.1978.sp012569
- 644 Buzsáki, G., & Mizuseki, K. (2014). The log-dynamic brain: how skewed distributions affect  
645 network operations. *Nature Reviews Neuroscience*, 15(4), 264-278. doi:  
646 10.1038/nrn3687
- 647 Cang, J., & Isaacson, J. S. (2003). In Vivo Whole-Cell Recording of Odor-Evoked Synaptic  
648 Transmission in the Rat Olfactory Bulb. *Journal of Neuroscience*, 23(10), 4108-4116.  
649 doi: 10.1523/JNEUROSCI.23-10-04108.2003
- 650 Carnevale, N. T., & Hines, M. L. (2006). *The NEURON Book* (Vol. 30).
- 651 Curtis, H. J., & Cole, K. S. (1938). Transverse Electric Impedance of the Squid Giant Axon.  
652 *The Journal of General Physiology*, 21(6), 757-765. doi: 10.1085/jgp.21.6.757
- 653 Demmer, H., & Kloppenburg, P. (2009). Intrinsic Membrane Properties and Inhibitory  
654 Synaptic Input of Kenyon Cells as Mechanisms for Sparse Coding? *Journal of*  
655 *Neurophysiology*, 102(3), 1538-1550. doi: 10.1152/jn.00183.2009
- 656 Eichler, K., Li, F., Litwin-Kumar, A., Park, Y., Andrade, I., Schneider-Mizell, C. M., . . .  
657 Cardona, A. (2017). The complete connectome of a learning and memory centre in  
658 an insect brain. *Nature*, 548(7666), 175-182. doi: 10.1038/nature23455
- 659 Friedrich, R. W., & Laurent, G. (2001). Dynamic Optimization of Odor Representations by  
660 Slow Temporal Patterning of Mitral Cell Activity. *Science*, 291(5505), 889-894. doi:  
661 10.1126/science.291.5505.889
- 662 Gentet, L. J., Stuart, G. J., & Clements, J. D. (2000). Direct measurement of specific  
663 membrane capacitance in neurons. *Biophysical Journal*, 79(1), 314-320.
- 664 Gupta, N., & Stopfer, M. (2012). Functional Analysis of a Higher Olfactory Center, the Lateral  
665 Horn. *The Journal of Neuroscience*, 32(24), 8138-8148. doi:  
666 10.1523/JNEUROSCI.1066-12.2012
- 667 Gupta, N., & Stopfer, M. (2014). A Temporal Channel for Information in Sparse Sensory  
668 Coding. *Current Biology*, 24(19), 2247-2256. doi: 10.1016/j.cub.2014.08.021
- 669 Hodgkin, A. L., & Huxley, A. F. (1952). A quantitative description of membrane current and  
670 its application to conduction and excitation in nerve. *The Journal of Physiology*,  
671 117(4), 500-544.
- 672 Hodgkin, A. L., & Rushton, W. A. H. (1946). The Electrical Constants of a Crustacean Nerve  
673 Fibre. *Proceedings of the Royal Society of London. Series B, Biological Sciences*,  
674 133(873), 444-479.
- 675 Inada, K., Tsuchimoto, Y., & Kazama, H. (2017). Origins of Cell-Type-Specific Olfactory  
676 Processing in the Drosophila Mushroom Body Circuit. *Neuron*, 95(2), 357-367.e354.  
677 doi: 10.1016/j.neuron.2017.06.039
- 678 Jortner, R. A., Farivar, S. S., & Laurent, G. (2007). A Simple Connectivity Scheme for  
679 Sparse Coding in an Olfactory System. *The Journal of Neuroscience*, 27(7), 1659-  
680 1669. doi: 10.1523/JNEUROSCI.4171-06.2007
- 681 Joseph, J., Dunn, F. A., & Stopfer, M. (2012). Spontaneous Olfactory Receptor Neuron  
682 Activity Determines Follower Cell Response Properties. *The Journal of*  
683 *Neuroscience*, 32(8), 2900-2910. doi: 10.1523/JNEUROSCI.4207-11.2012
- 684 Kay, L. M., & Stopfer, M. (2006). Information processing in the olfactory systems of insects  
685 and vertebrates. *Seminars in Cell & Developmental Biology*, 17(4), 433-442. doi:  
686 10.1016/j.semcd.2006.04.012
- 687 Kee, T., Sanda, P., Gupta, N., Stopfer, M., & Bazhenov, M. (2015). Feed-Forward versus  
688 Feedback Inhibition in a Basic Olfactory Circuit. *PLOS Comput Biol*, 11(10),  
689 e1004531. doi: 10.1371/journal.pcbi.1004531
- 690 Large, A. M., Vogler, N. W., Canto-Bustos, M., Friason, F. K., Schick, P., & Oswald, A.-M. M.  
691 (2018). Differential inhibition of pyramidal cells and inhibitory interneurons along the  
692 rostrocaudal axis of anterior piriform cortex. *Proceedings of the National Academy of*  
693 *Sciences*, 115(34), E8067-E8076. doi: 10.1073/pnas.1802428115



- 694 Large, A. M., Vogler, N. W., Mielo, S., & Oswald, A.-M. M. (2016). Balanced feedforward  
695 inhibition and dominant recurrent inhibition in olfactory cortex. *Proceedings of the*  
696 *National Academy of Sciences*, 113(8), 2276-2281. doi: 10.1073/pnas.1519295113
- 697 Laurent, G. (1991). Evidence for voltage-activated outward currents in the neuropilar  
698 membrane of locust nonspiking local interneurons. *Journal of Neuroscience*, 11(6),  
699 1713-1726. doi: 10.1523/JNEUROSCI.11-06-01713.1991
- 700 Laurent, G., & Davidowitz, H. (1994). Encoding of Olfactory Information with Oscillating  
701 Neural Assemblies. *Science*, 265(5180), 1872-1875. doi:  
702 10.1126/science.265.5180.1872
- 703 Laurent, G., & Naraghi, M. (1994). Odorant-induced oscillations in the mushroom bodies of  
704 the locust. *J. Neurosci.*, 14, 2993-3004.
- 705 Laurent, G., Seymour-Laurent, K. J., & Johnson, K. (1993). Dendritic excitability and a  
706 voltage-gated calcium current in locust nonspiking local interneurons. *Journal of*  
707 *Neurophysiology*, 69(5), 1484-1498.
- 708 Laurent, G., Wehr, M., & Davidowitz, H. (1996). Temporal Representations of Odors in an  
709 Olfactory Network. *The Journal of Neuroscience*, 16(12), 3837-3847.
- 710 Leitch, B., & Laurent, G. (1996). GABAergic synapses in the antennal lobe and mushroom  
711 body of the locust olfactory system. *The Journal of Comparative Neurology*, 372(4),  
712 487-514. doi: 10.1002/(SICI)1096-9861(19960902)372:4<487::AID-  
713 CNE1>3.0.CO;2-0
- 714 Lin, A. C., Bygrave, A. M., de Calignon, A., Lee, T., & Miesenböck, G. (2014). Sparse,  
715 decorrelated odor coding in the mushroom body enhances learned odor  
716 discrimination. *Nature Neuroscience*, 17(4), 559-568. doi: 10.1038/nn.3660
- 717 Loewenstein, Y., Kuras, A., & Rumpel, S. (2011). Multiplicative Dynamics Underlie the  
718 Emergence of the Log-Normal Distribution of Spine Sizes in the Neocortex In Vivo.  
719 *The Journal of Neuroscience*, 31(26), 9481-9488. doi: 10.1523/JNEUROSCI.6130-  
720 10.2011
- 721 Luna, V. M., & Pettit, D. L. (2010). Asymmetric rostro-caudal inhibition in the primary  
722 olfactory cortex. *Nature Neuroscience*, 13(5), 533-535. doi: 10.1038/nn.2524
- 723 MacLeod, K., & Laurent, G. (1996). Distinct Mechanisms for Synchronization and Temporal  
724 Patterning of Odor-Encoding Neural Assemblies. *Science*, 274(5289), 976-979. doi:  
725 10.1126/science.274.5289.976
- 726 Manor, Y., Nadim, F., Abbott, L. F., & Marder, E. (1997). Temporal Dynamics of Graded  
727 Synaptic Transmission in the Lobster Stomatogastric Ganglion. *Journal of*  
728 *Neuroscience*, 17(14), 5610-5621. doi: 10.1523/JNEUROSCI.17-14-05610.1997
- 729 Marder, E., & Goaillard, J.-M. (2006). Variability, compensation and homeostasis in neuron  
730 and network function. *Nature Reviews Neuroscience*, 7(7), 563-574. doi:  
731 10.1038/nrn1949
- 732 Mazor, O., & Laurent, G. (2005). Transient dynamics versus fixed points in odor  
733 representations by locust antennal lobe projection neurons. *Neuron*, 48, 661-673.  
734 doi: 10.1016/j.neuron.2005.09.032
- 735 Palmer, M. J., & Harvey, J. (2014). Honeybee Kenyon cells are regulated by a tonic GABA  
736 receptor conductance. *Journal of Neurophysiology*, 112(8), 2026-2035. doi:  
737 10.1152/jn.00180.2014
- 738 Papadopoulou, M., Cassenaer, S., Nowotny, T., & Laurent, G. (2011). Normalization for  
739 Sparse Encoding of Odors by a Wide-Field Interneuron. *Science*, 332(6030), 721-  
740 725. doi: 10.1126/science.1201835
- 741 Peng, F., & Chittka, L. (2017). A Simple Computational Model of the Bee Mushroom Body  
742 Can Explain Seemingly Complex Forms of Olfactory Learning and Memory. *Current*  
743 *Biology*, 27(2), 224-230. doi: 10.1016/j.cub.2016.10.054
- 744 Perez-Orive, J., Bazhenov, M., & Laurent, G. (2004). Intrinsic and Circuit Properties Favor  
745 Coincidence Detection for Decoding Oscillatory Input. *Journal of Neuroscience*,  
746 24(26), 6037-6047. doi: 10.1523/JNEUROSCI.1084-04.2004

- 747 Perez-Orive, J., Mazor, O., Turner, G. C., Cassenaer, S., Wilson, R. I., & Laurent, G. (2002).  
748 Oscillations and Sparsening of Odor Representations in the Mushroom Body.  
749 *Science*, 297(5580), 359-365. doi: 10.1126/science.1070502
- 750 Poo, C., & Isaacson, J. S. (2009). Odor Representations in Olfactory Cortex: "Sparse"  
751 Coding, Global Inhibition, and Oscillations. *Neuron*, 62(6), 850-861. doi:  
752 10.1016/j.neuron.2009.05.022
- 753 Pouille, F., Marin-Burgin, A., Adesnik, H., Atallah, B. V., & Scanziani, M. (2009). Input  
754 normalization by global feedforward inhibition expands cortical dynamic range.  
755 *Nature Neuroscience*, 12(12), 1577-1585. doi: 10.1038/nn.2441
- 756 Rall, W. (1964). Theoretical significance of dendritic trees for neuronal input-output relations.  
757 In R. F. Reiss (Ed.), *Neural Theory and Modeling* (pp. 73-97). Stanford, CA: Stanford  
758 Univ. Press.
- 759 Raman, B., Joseph, J., Tang, J., & Stopfer, M. (2010). Temporally diverse firing patterns in  
760 olfactory receptor neurons underlie spatiotemporal neural codes for odors. *The*  
761 *Journal of neuroscience : the official journal of the Society for Neuroscience*, 30(6),  
762 1994-2006. doi: 10.1523/JNEUROSCI.5639-09.2010
- 763 Ray, S., Chintaluri, C., Bhalla, U. S., & Wójcik, D. K. (2015). NSDF: Neuroscience Simulation  
764 Data Format. *Neuroinformatics*, 14(2), 147-167. doi: 10.1007/s12021-015-9282-5
- 765 Roth, A., & Häusser, M. (2001). Compartmental models of rat cerebellar Purkinje cells based  
766 on simultaneous somatic and dendritic patch-clamp recordings. *The Journal of*  
767 *Physiology*, 535(Pt 2), 445-472.
- 768 Shimizu, K., & Stopfer, M. (2017). A Population of Projection Neurons that Inhibits the  
769 Lateral Horn but Excites the Antennal Lobe through Chemical Synapses in  
770 *Drosophila*. *Frontiers in Neural Circuits*, 11. doi: 10.3389/fncir.2017.00030
- 771 Song, S., Sjöström, P. J., Reigl, M., Nelson, S., & Chklovskii, D. B. (2005). Highly  
772 Nonrandom Features of Synaptic Connectivity in Local Cortical Circuits. *PLoS Biol*,  
773 3(3), e68. doi: 10.1371/journal.pbio.0030068
- 774 Stettler, D. D., & Axel, R. (2009). Representations of Odor in the Piriform Cortex. *Neuron*,  
775 63(6), 854-864. doi: 10.1016/j.neuron.2009.09.005
- 776 Stopfer, M., Jayaraman, V., & Laurent, G. (2003). Intensity versus identity coding in an  
777 olfactory system. *Neuron*, 39, 991-1004. doi: 10.1016/j.neuron.2003.08.011
- 778 Stuart, G., & Spruston, N. (1998). Determinants of Voltage Attenuation in Neocortical  
779 Pyramidal Neuron Dendrites. *Journal of Neuroscience*, 18(10), 3501-3510. doi:  
780 10.1523/JNEUROSCI.18-10-03501.1998
- 781 Susaki, Etsuo A., Tainaka, K., Perrin, D., Kishino, F., Tawara, T., Watanabe, Tomonobu M., .  
782 . . Ueda, Hiroki R. (2014). Whole-Brain Imaging with Single-Cell Resolution Using  
783 Chemical Cocktails and Computational Analysis. *Cell*, 157(3), 726-739. doi:  
784 10.1016/j.cell.2014.03.042
- 785 Wüstenberg, D. G., Boytcheva, M., Grünewald, B., Byrne, J. H., Menzel, R., & Baxter, D. A.  
786 (2004). Current- and Voltage-Clamp Recordings and Computer Simulations of  
787 Kenyon Cells in the Honeybee. *Journal of Neurophysiology*, 92(4), 2589-2603. doi:  
788 10.1152/jn.01259.2003
- 789 Zheng, Z., Lauritzen, J. S., Perlman, E., Robinson, C. G., Nichols, M., Milkie, D., . . . Bock,  
790 D. D. (2018). A Complete Electron Microscopy Volume of the Brain of Adult  
791 *Drosophila melanogaster*. *Cell*, 174(3), 730-743.e722. doi: 10.1016/j.cell.2018.06.019

792

793

## 794 Figure legends

795 **Figure 1** GGN is a very large neuron, one per hemisphere, spanning a large portion of the  
796 locust brain. **(a)** Left hemisphere: Dye filled GGN (green) in a locust brain (magenta,  
797 visualized with nc82 antibody) with an overlaid KC tracing (orange, filled in a different brain).  
798 Dorsal: towards the viewer; ventral: into the page). Right hemisphere: Circuit diagram of the  
799 locust olfactory system. Arrows show known synaptic connections, + excitatory, - inhibitory.  
800 Scale bar: 200  $\mu\text{m}$ . **(b)** Very thin, feather-like neurites from GGN wrap around and penetrate  
801 the peduncle of the mushroom body, not included in our reconstruction. **(c)** GGN's neurites  
802 in the calyx have many bouton-like protrusions **(d)** whereas GGN's  $\alpha$  lobe branches are  
803 relatively smooth. **(b-d)** scalebars: 100  $\mu\text{m}$ . **(e)** 3D reconstruction of the same neuron shown  
804 in panel a viewed from **(i)** ventral and **(ii)** posterior side of the brain. Major branches shown  
805 in different colors. LCA: lateral calyx, MCA: medial calyx, LH: lateral horn, a: anterior, p:  
806 posterior, d: dorsal, v: ventral, l: lateral and m: medial.

807 **Figure 2** Passive voltage spread through GGN. **(a)** Simulation schematic: GGN's  $\alpha$  lobe  
808 branch was clamped at its stem to -40 mV (from a holding voltage of -51mV). **(b)** Conditions  
809 described in panel a lead to different steady state depolarizations of the GGN model at  
810 different locations; color indicates voltage change from resting potential; axial resistivity  
811  $RA=100 \Omega\text{cm}$ ; membrane resistivity  $RM=33 \text{ k}\Omega\text{cm}^2$ . **(c)** Violin plots showing distribution of  
812 depolarization in the  $\alpha$  lobe and the calyceal dendrites of GGN for conditions described in  
813 panel a; width of gray area indicates density, white line median, and whiskers data range. **(d)**  
814 Schematic of simulation of multiple, random synaptic inputs to GGN: 500 synapses were  
815 connected to GGN's  $\alpha$  lobe branch. **(e)** Bottom: raster plot of incoming spike times at all 500  
816 synapses. The spikes arrived at each synapse at random times at linearly decreasing rate,  
817 starting with 20/s down to 0 after 500 ms. Top: for conditions shown in panel d, membrane  
818 potentials at randomly sampled terminal neurites in different regions of GGN. **(f)** Violin plots  
819 of peak depolarizations in the  $\alpha$  lobe dendrites and the calyceal dendrites in model

820 described in panel d. **(g)** Violin plots of distribution of depolarizations in the calyx for different  
821 values of axial resistivity (RA, bottom) and membrane resistivity (RM, right) for the voltage  
822 clamp simulation described in panel a. Lines connect the median results for specified RMs  
823 (right).

824 **Figure 3** Feedback inhibition from GGN extends the dynamic range of KCs. **(a)** Model  
825 schematic: A single KC sends 50,000 excitatory synapses with random delays of 0-60 ms  
826 into GGN's  $\alpha$  lobe branch. The KC receives feedback inhibition via a graded synapse from  
827 GGN's calyceal branch. A step current is injected into the KC from 500-3000ms (the end of  
828 simulation). **(b)** Comparison of membrane potential evoked by current pulses of different  
829 amplitudes in isolated KC (left) and KC with feedback inhibition (right). As the amplitude of  
830 the current pulse increases, the KC's spiking first increases, and then, as the membrane  
831 potential nears saturation, decreases. **(c)** Comparison of the number of spikes evoked in KC  
832 with and without feedback inhibition during the 2500 ms current step.

833 **Figure 4** *In vivo*, GGN's responses to odors vary with odor and animal. Examples from 3  
834 animals and 2 odors (horizontal gray bars, 1 s) (black traces: average of 5 trials, gray:  
835 standard error of the mean, data low-pass filtered at 49 Hz). Response features include  
836 depolarization or hyperpolarization upon stimulus onset and/or offset, and depolarization or  
837 hyperpolarization evoked by different odors in the same GGN.

838 **Figure 5** Tuning the olfactory network by reference to GGN's olfactory responses required  
839 heterogeneous synaptic strengths onto KCs and structured patterns of activity in PNs,  
840 predicting a small proportion of hyperactive KC responses. **(a)** Schematic of mushroom body  
841 network model. Each of the 50,000 KCs receives input from 50% of the 830 PNs, which are  
842 modeled as spike trains. All KCs excite GGN in its  $\alpha$  lobe branch and receive inhibition from  
843 a random calyceal branch of GGN. **(b-d)** Model with simplified, homogenous firing patterns  
844 in PNs and uniform synaptic strengths generates unrealistic membrane potential in GGN. **(b)**  
845 Raster plot of model PN spike trains (67 shown); dots in each row mark spike times in a PN.

846 **(c)** Raster plot of spike trains evoked in the KCs (397 shown) when all of them receive  
847 identically strong inhibitory connections from GGN. **(d)** Unrealistic membrane potential in  
848 GGN features a few peaks corresponding to highly synchronized bouts of activity in KCs. **(e-  
849 f)** Model in which subpopulations of PNs have different temporal patterns of spiking during  
850 and after odor stimulation generates unrealistic membrane potential in GGN. **(e)** Rasters  
851 show different firing patterns in different PNs. **(f)** Simulation of model with PN activity pattern  
852 in panel e and uniform synaptic strengths onto KCs generates unrealistic membrane  
853 potential in GGN. **(g)** Simulated membrane potential of GGN in a model with both structured  
854 PN activity patterns in panel e and heterogeneous synaptic strengths gives rise to sustained  
855 depolarization of GGN similar to that observed *in vivo* (e.g. Figure 4 animal 1). Dark gray  
856 bar: 1 s odor stimulation; light gray bar: 200 ms “off response” period. **(h)** Histogram of KC  
857 firing rates in the network model giving the realistic result shown in panel g; odors evoke in  
858 most KCs 0-2 spikes/s, but in a few KCs higher firing rates.

859 **Figure 6** *In vivo*, some KC responses are hyperactive, as predicted. **(a)** KC firing rate  
860 averaged over 707 KC-odor pairs. Shaded region indicates standard error of the mean.  
861 Black horizontal bar: 1 s odor stimulation. **(b)** A hyperactive response KC filled with dye  
862 (mushroom body calyx and pedunculus outlined with dashed lines (scale bar: 50  $\mu$ m) and **(c)**  
863 its recorded membrane potential in response to odor stimulus, and **(d)** its average firing rate  
864 elicited by this stimulus. **(e)** Histogram of average number of spikes in KCs across trials  
865 upon odor presentation.

866 **Figure 7** An additional, unidentified olfactory pathway to IG is needed to explain odor-elicited  
867 hyperpolarization in GGN. **(a)** *In vivo* recordings of GGN’s membrane potential from two  
868 animals showing IPSPs (arrowheads) believed to originate as spikes in IG. Vertical scale  
869 bar: 10 mV. **(b)** Peristimulus time histogram (PSTH) shows IPSP peak times from 1257  
870 odor-trials across 47 GGNs, presumably reflecting spikes in IG. Black horizontal bar: odor  
871 presentation in panels a and b, which share the time axis. **(c)** Same as panel b but showing  
872 full responses. **(d)** Schematic of model with IG receiving direct excitation from KCs and



873 reciprocal inhibition with GGN. **(e)** Top: simulated GGN membrane potential including odor-  
874 elicited hyperpolarization mimics responses observed *in vivo* (e.g. Figure 4, Animal 3,  
875 hexanal). Bottom: corresponding simulated IG membrane potential. This simulation included  
876 a 200 ms synaptic delay from KCs to IG. The PN activity patterns were like those shown in  
877 Figure 5. **(f-g)** Varying the temporal pattern of PN population activity can produce different  
878 response pattern in the same network as e. **(f)** Raster plot of PN activity with a different  
879 temporal pattern from that in e. **(g)** Top: simulated GGN membrane potential including odor  
880 evoked de- and hyperpolarization (similar to Figure 4, Animal 1 hexanal). Bottom:  
881 corresponding simulated IG membrane potential. **(h)** Spontaneous activity in IG does not  
882 originate in the antennal lobe. Top two black traces show spontaneous IPSPs in GGN's  
883 membrane voltage from two animals with intact olfactory systems. The bottom two red traces  
884 are from the left and the right GGN in another animal in which the antennal lobes had been  
885 silenced by cutting both antennal nerves. Vertical scale bar 5 mV, horizontal scale bar 1 s.

886 **Figure 8** Updated olfactory connectivity model where odor responses in the KC population  
887 are gated by feedback inhibition from GGN and inhibition of GGN via odor evoked spiking in  
888 IG, which itself receives input from an unknown olfactory pathway.

889

## 890 Supplemental Information

891

892 **Video S1. Related to Figure 1:** 3D view of the confocal stack of the dye filled GGN in  
893 Figure 1a.

894 **Video S2. Related to Figure 2:** 3D view of depolarizations (color coded spheres) at various  
895 locations in GGN arbor in simulation described in Figure 2a.

896 **Figure S3. Related to Figure 2:** KC activity vs GGN voltage deflection in simulations where  
897 all KCs received identical PN input.  GGN->KC maximum conductance 0.7 nS and PN-

898 > KC maximum conductance 3.7 pS,  GGN->KC maximum conductance 0.5 nS and PN-  
899 > KC maximum conductance 3.7 pS,  GGN->KC maximum conductance 0.9 nS and  
900 PN-> KC maximum conductance 4.0 pS,  GGN->KC maximum conductance 0.9 nS and  
901 PN-> KC maximum conductance 4.5 pS. GGN segments were grouped by peak  
902 depolarization from resting potential and the total number of spiking KCs postsynaptic to  
903 these segments (top) or the total number of spikes in the KCs postsynaptic to these  
904 segments (bottom) were normalized by the total number of spiking and nonspiking KC post  
905 synaptic to these segments.

906 **Figure S4. Related to Figure 5:** Model with steady activity in a fixed set of PNs (as in  
907 Figure 5b) can produce sustained depolarization of GGN when the synaptic strengths are  
908 lognormally distributed. Gray: 1 s odor stimulus.



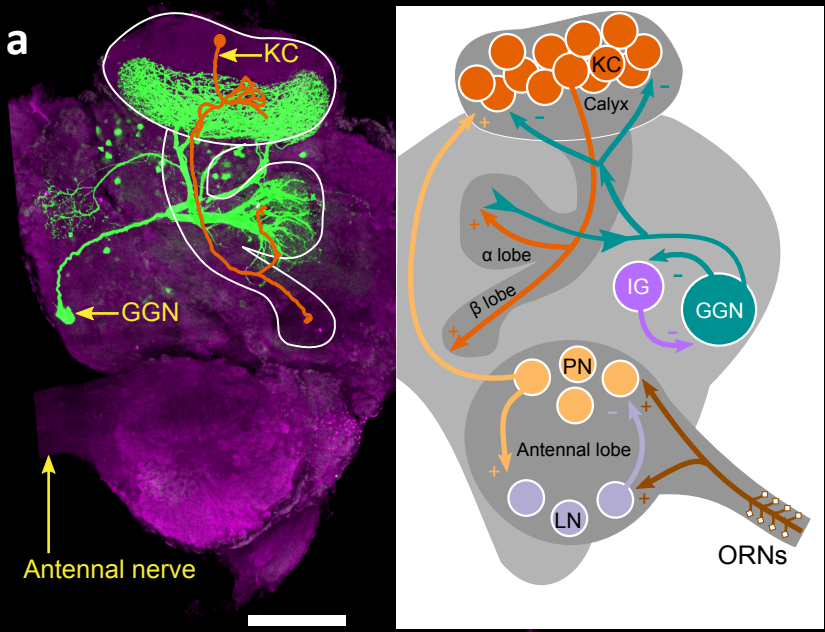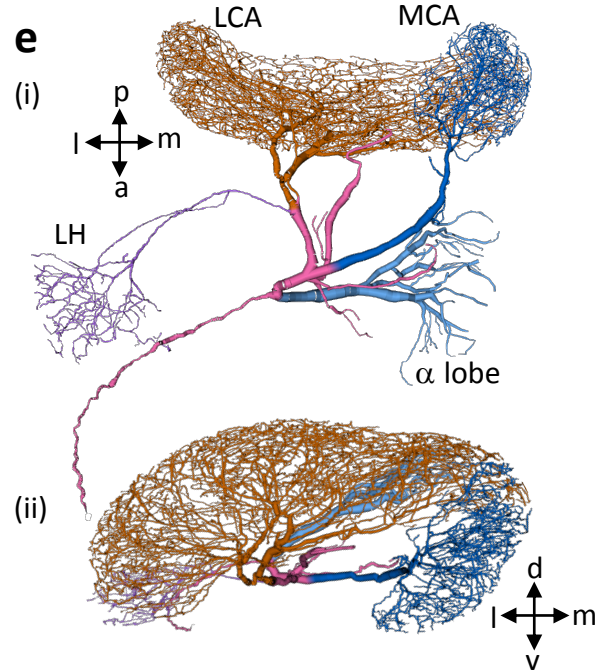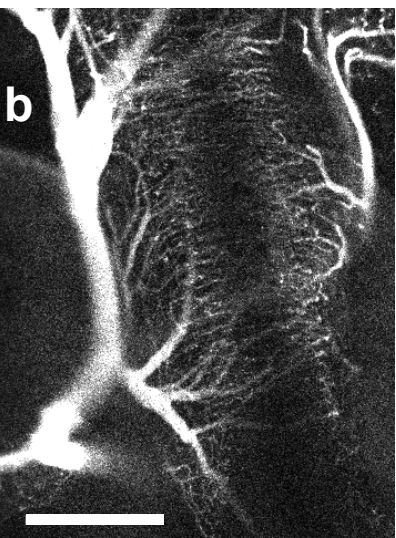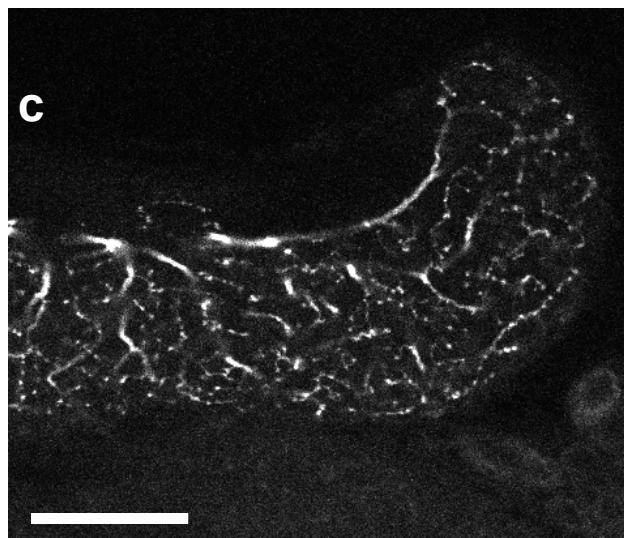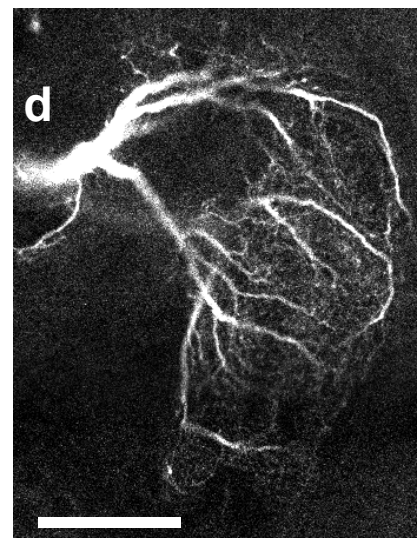

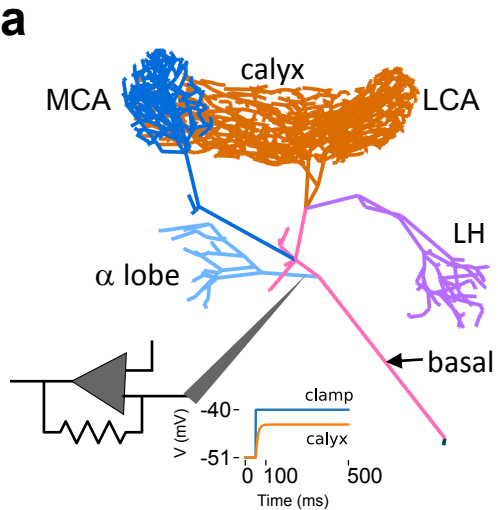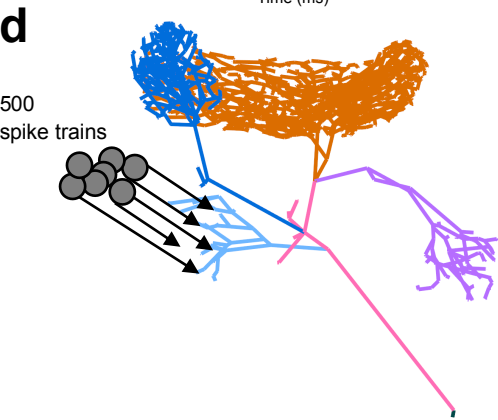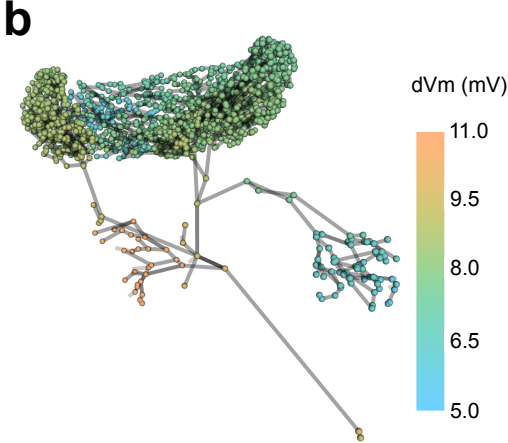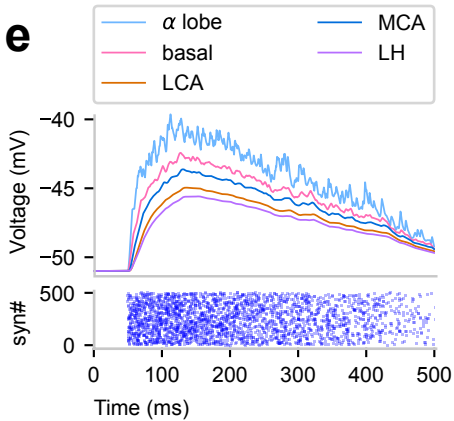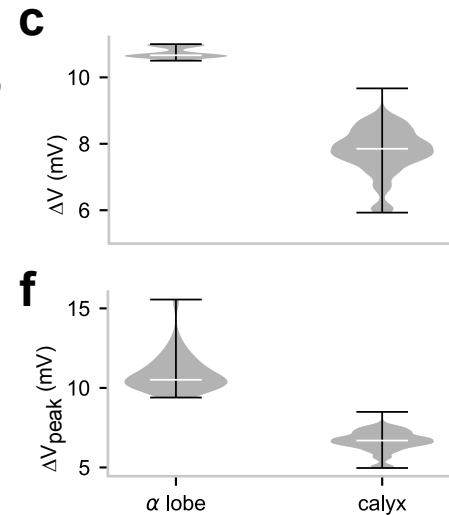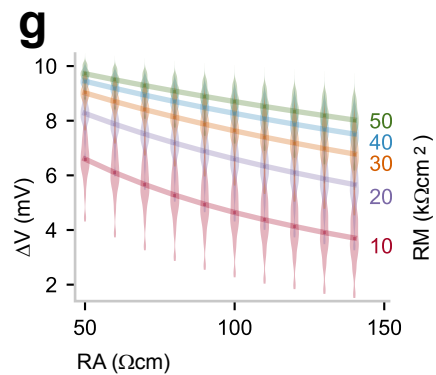

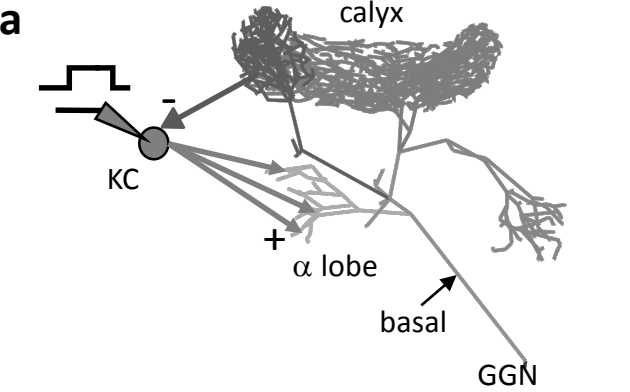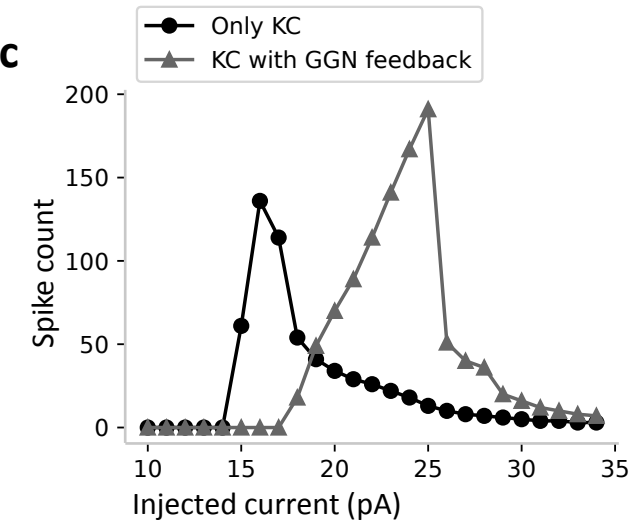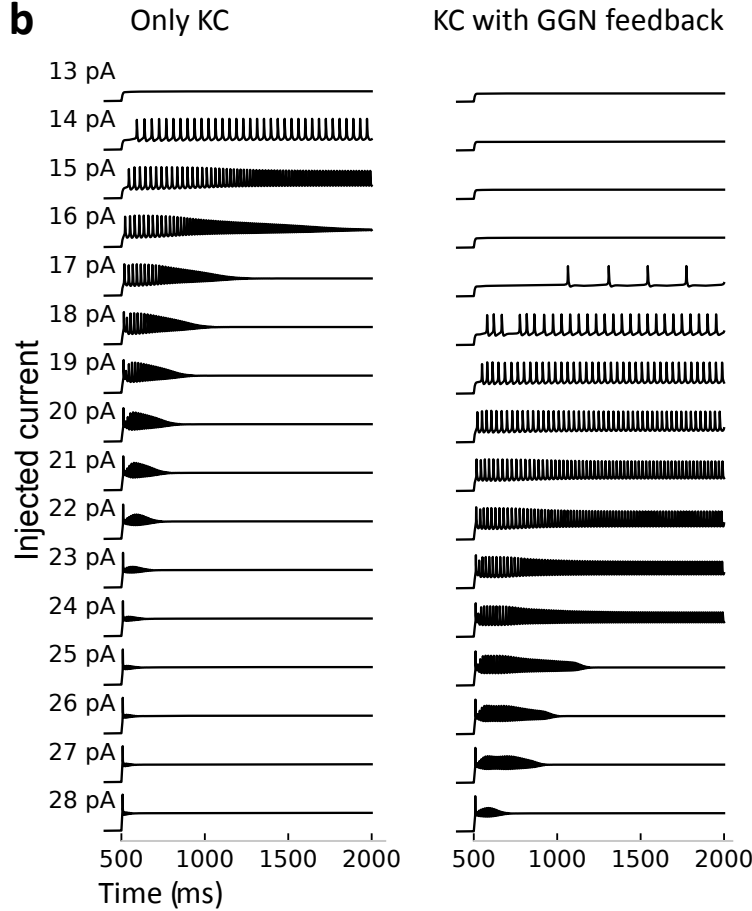

Animal 1

Animal 2

Animal 3

1-Hexanol

Hexanal

Odor

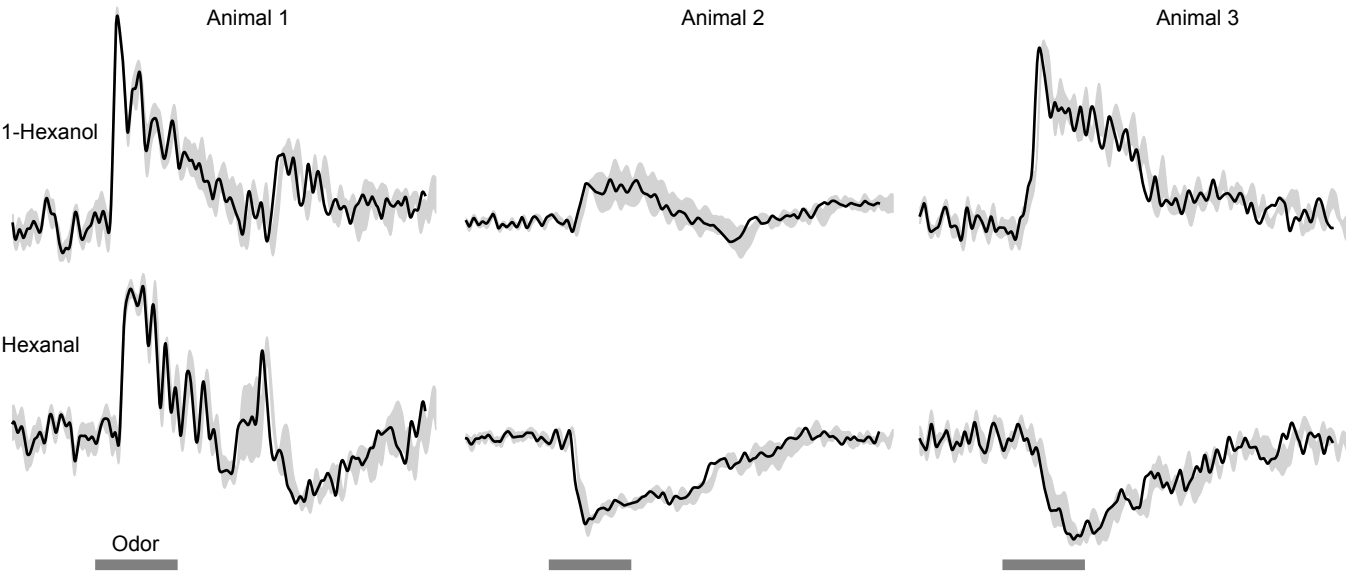

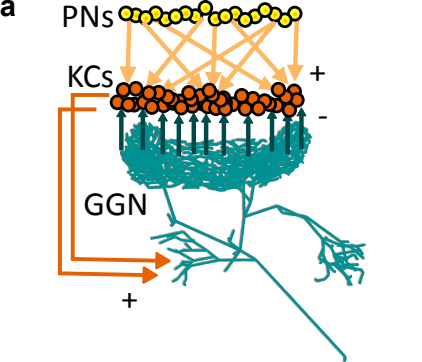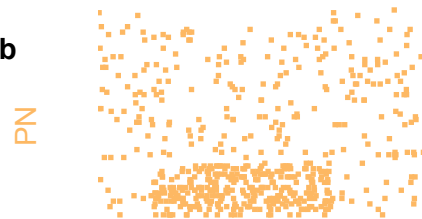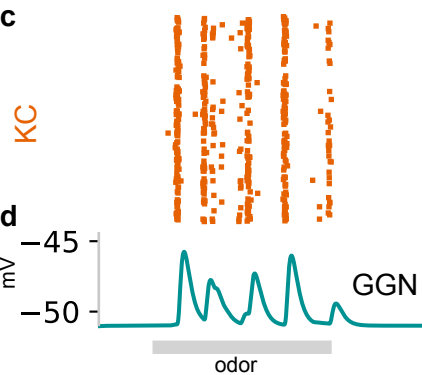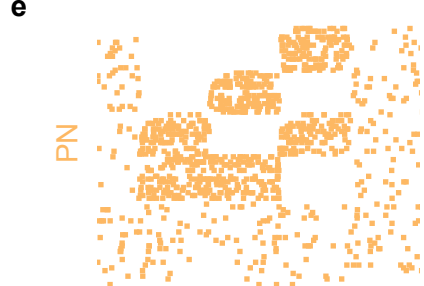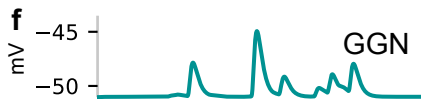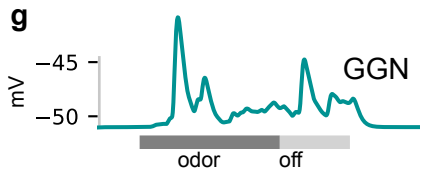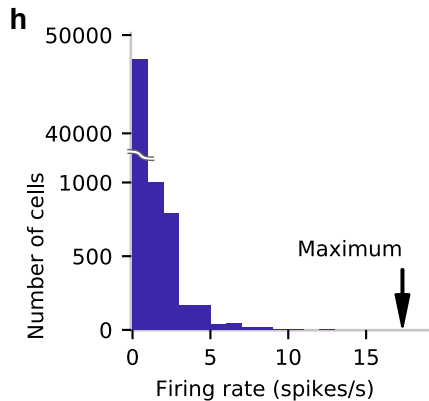

**a**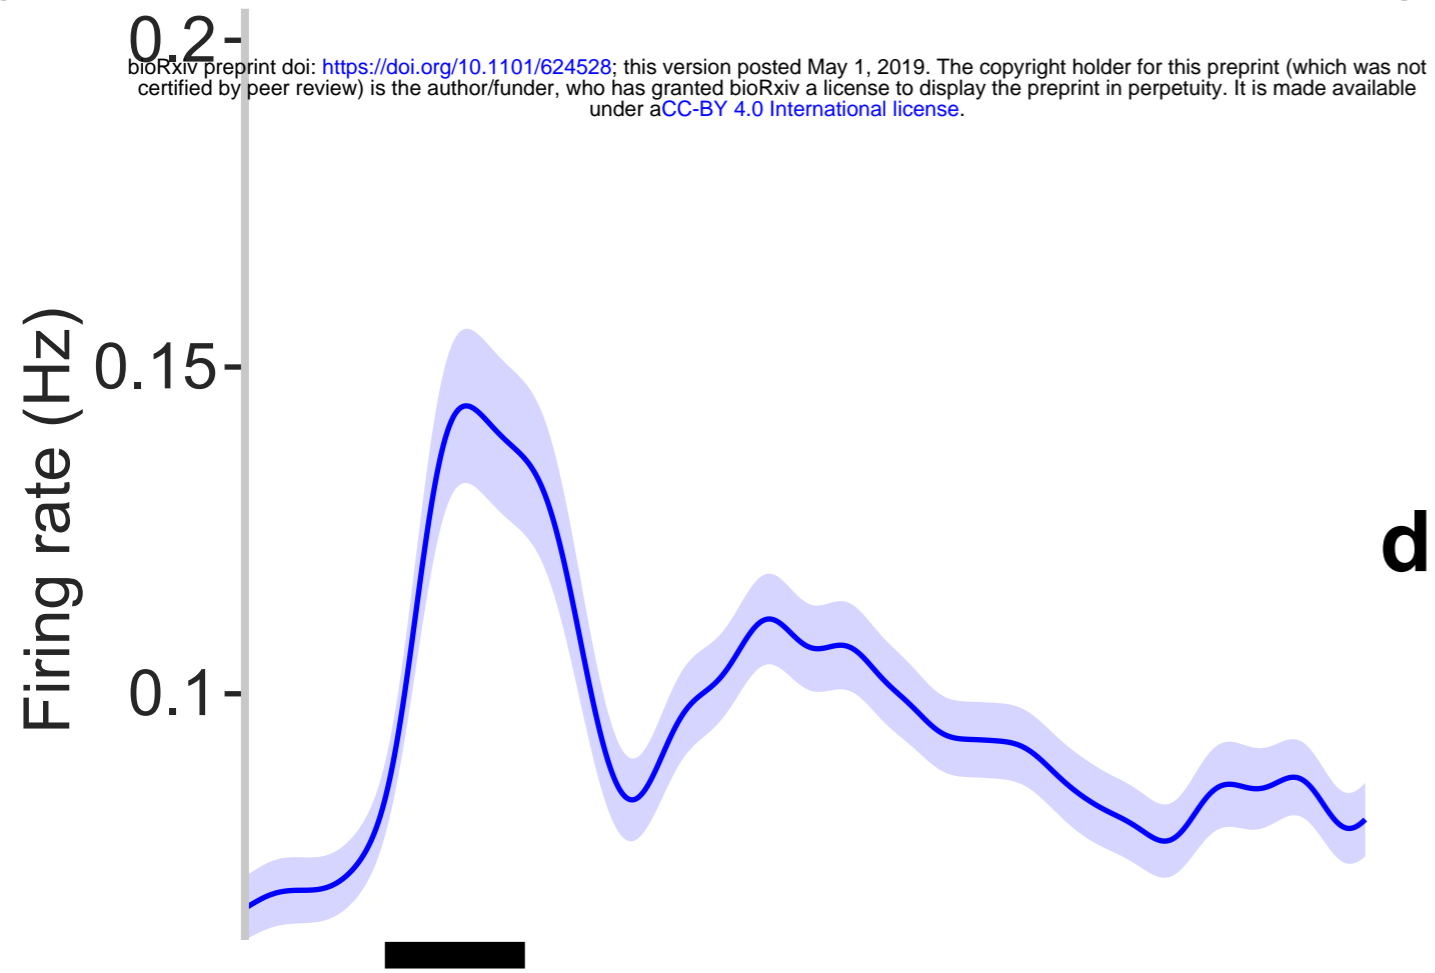**b**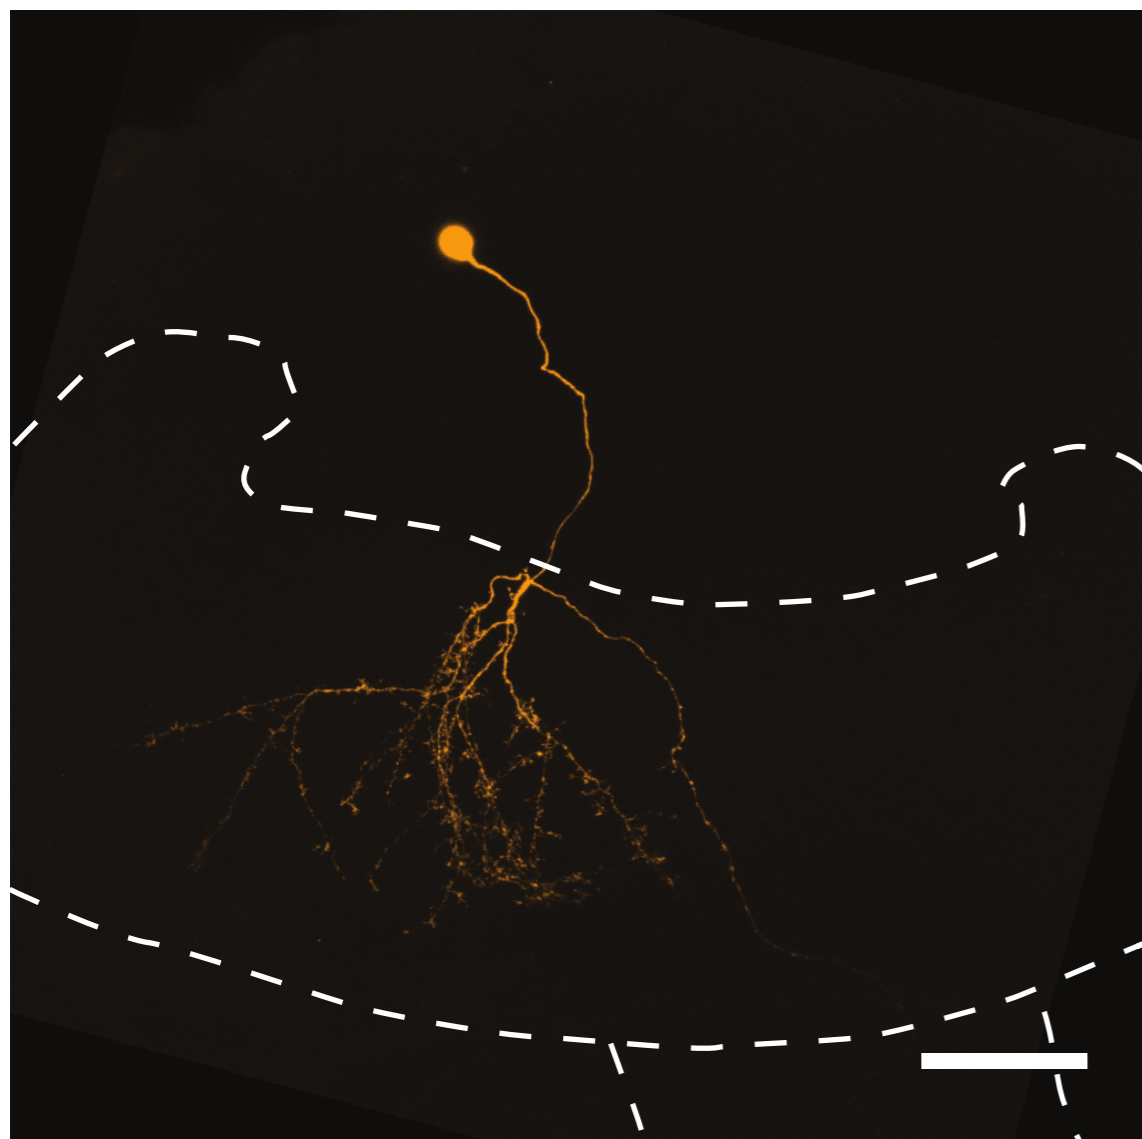**c**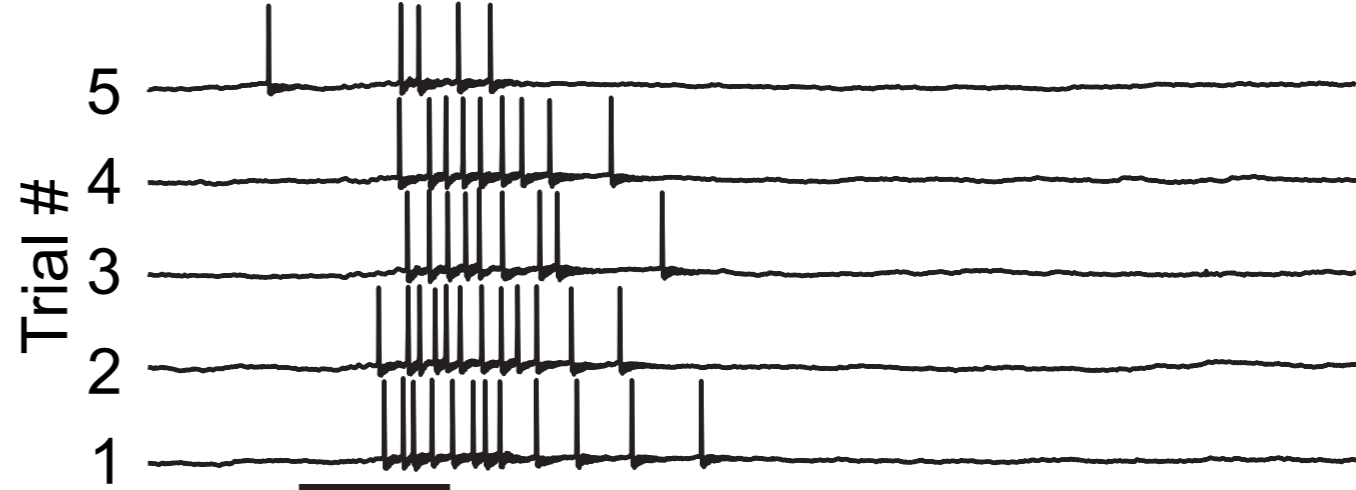**d**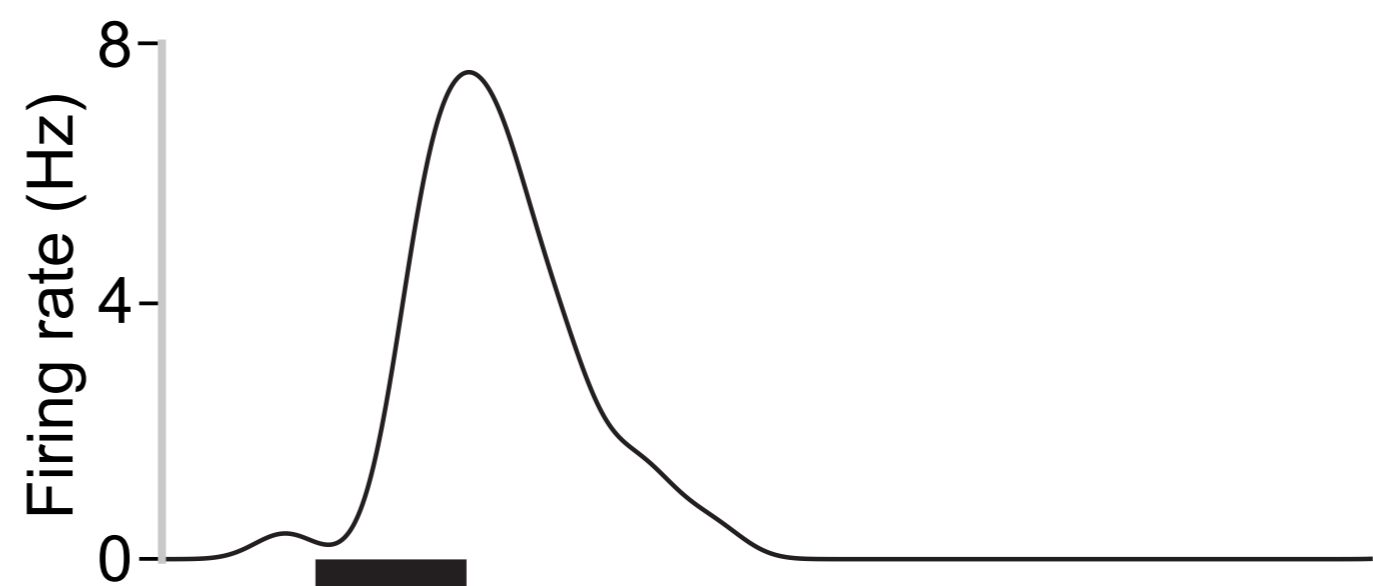**e**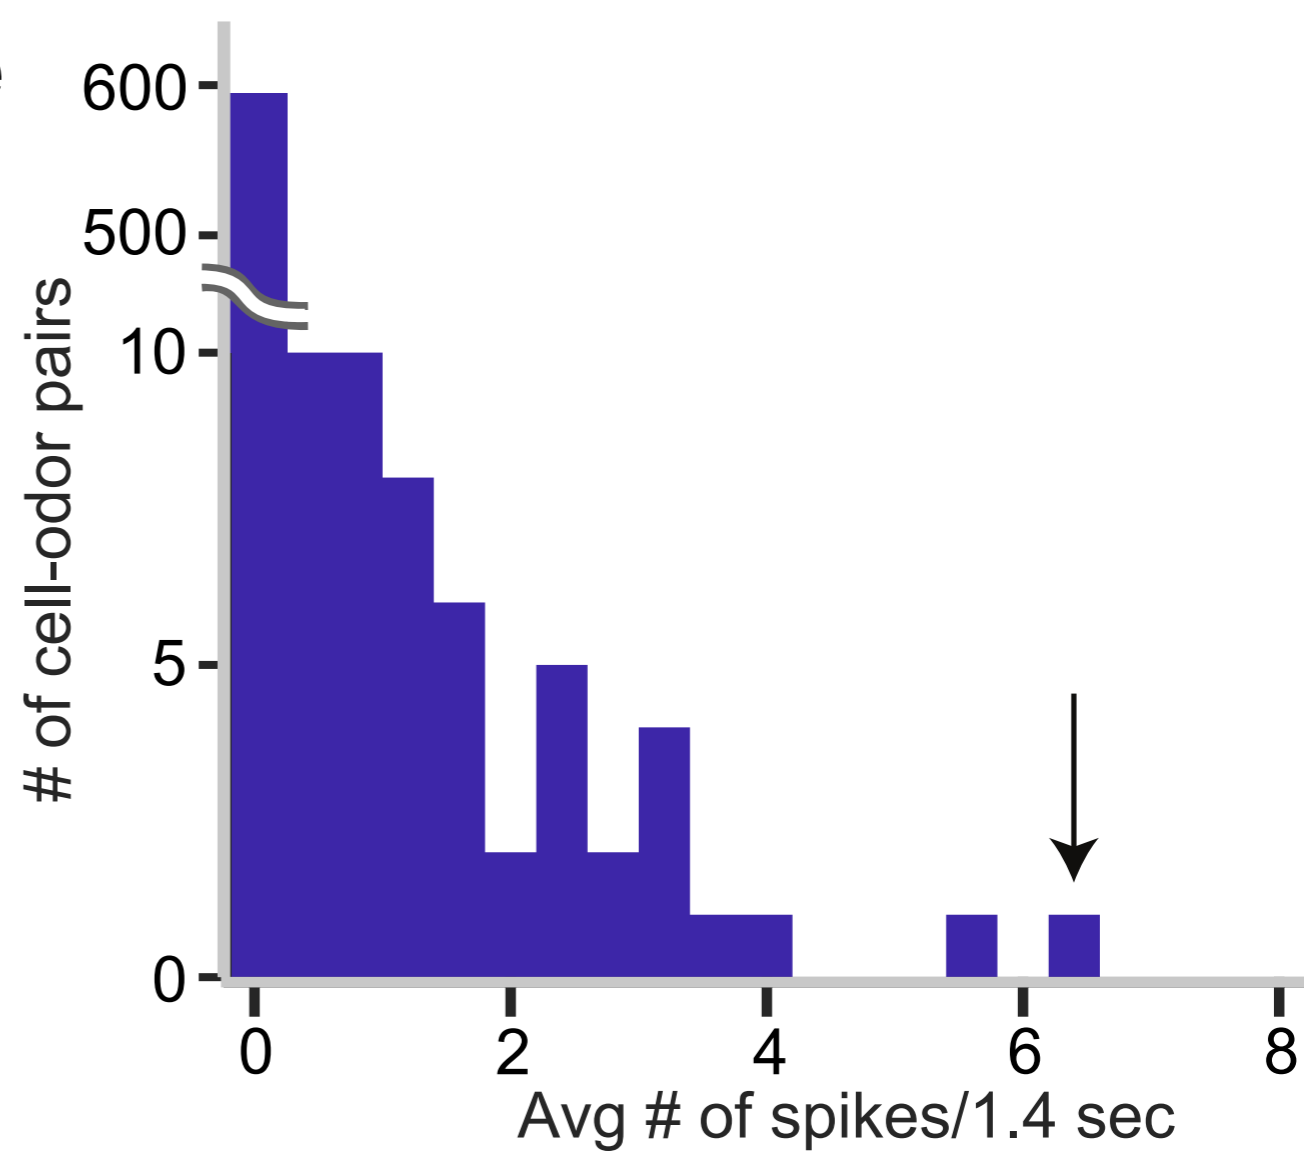



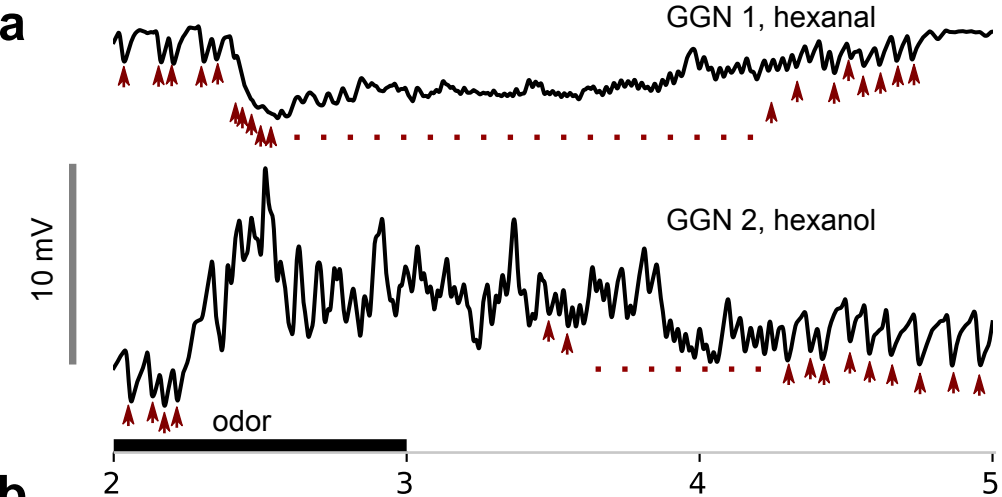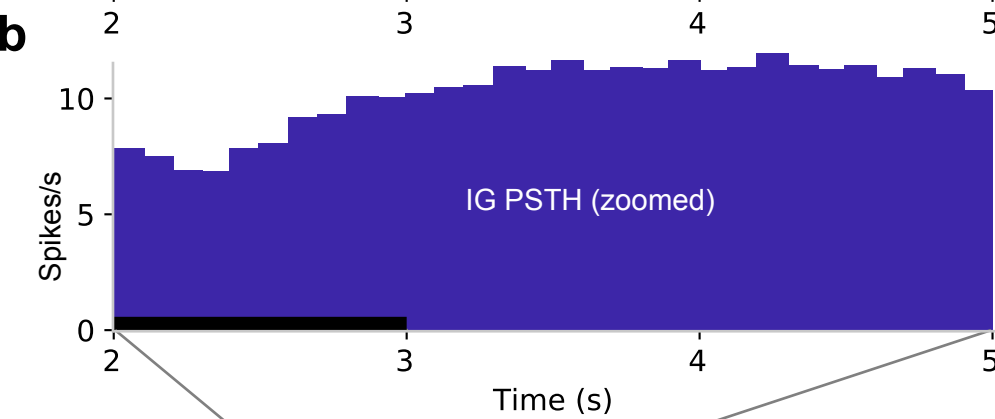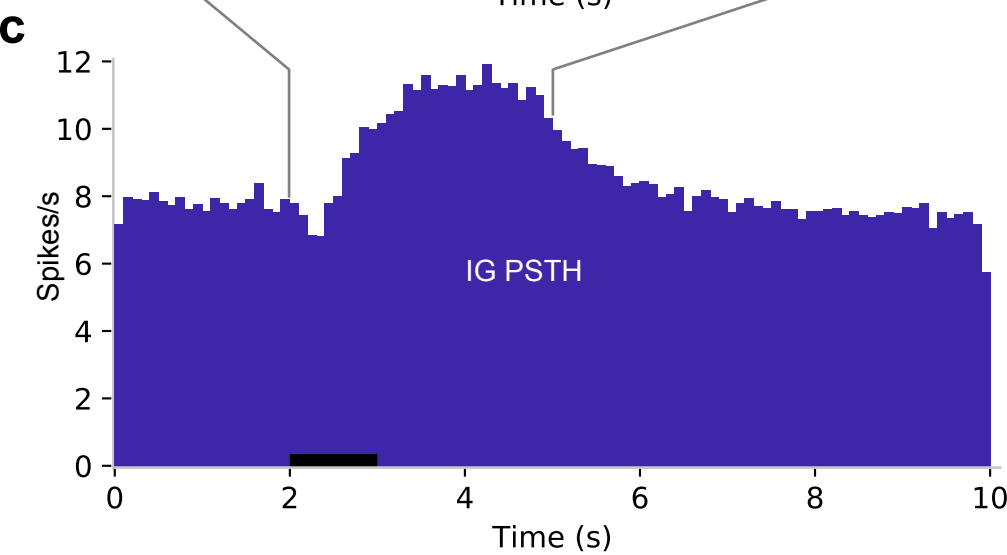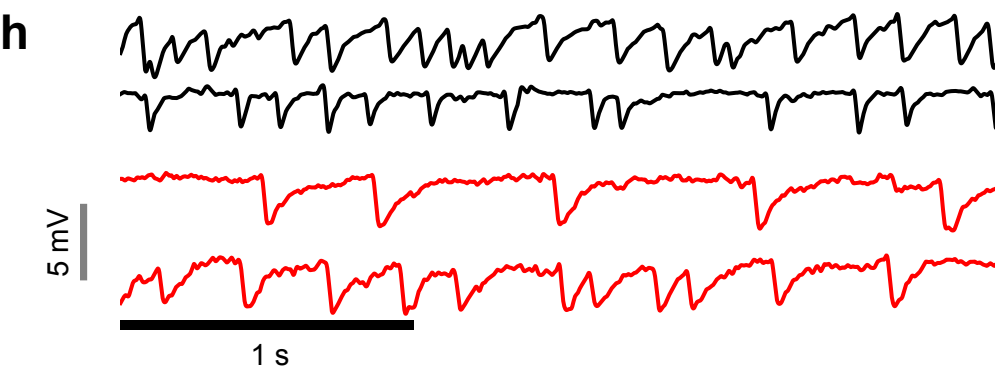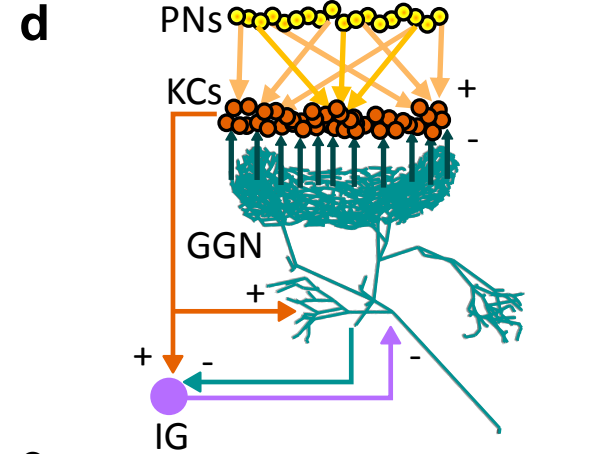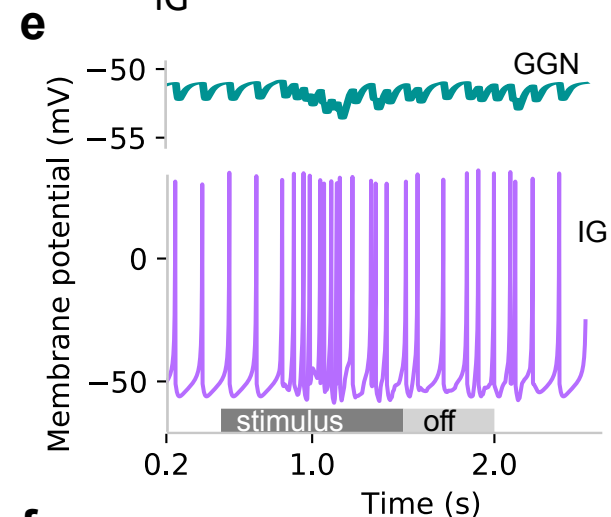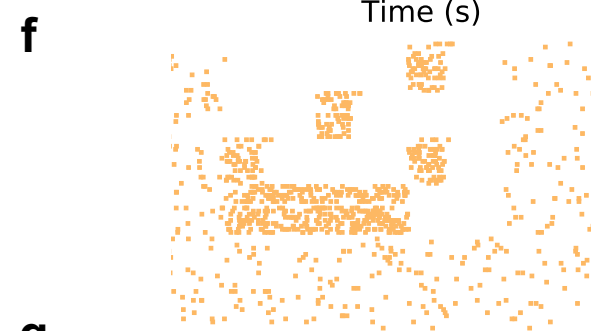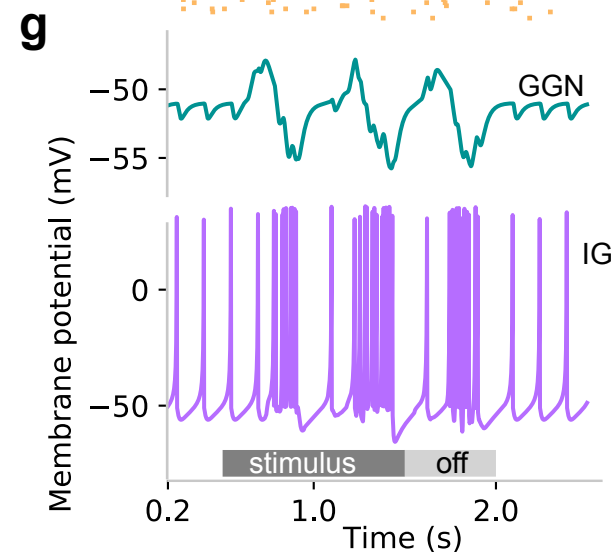



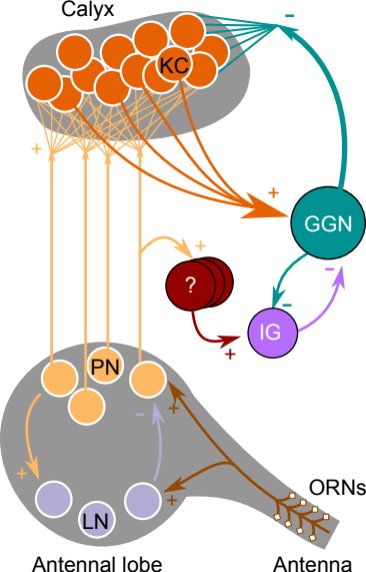

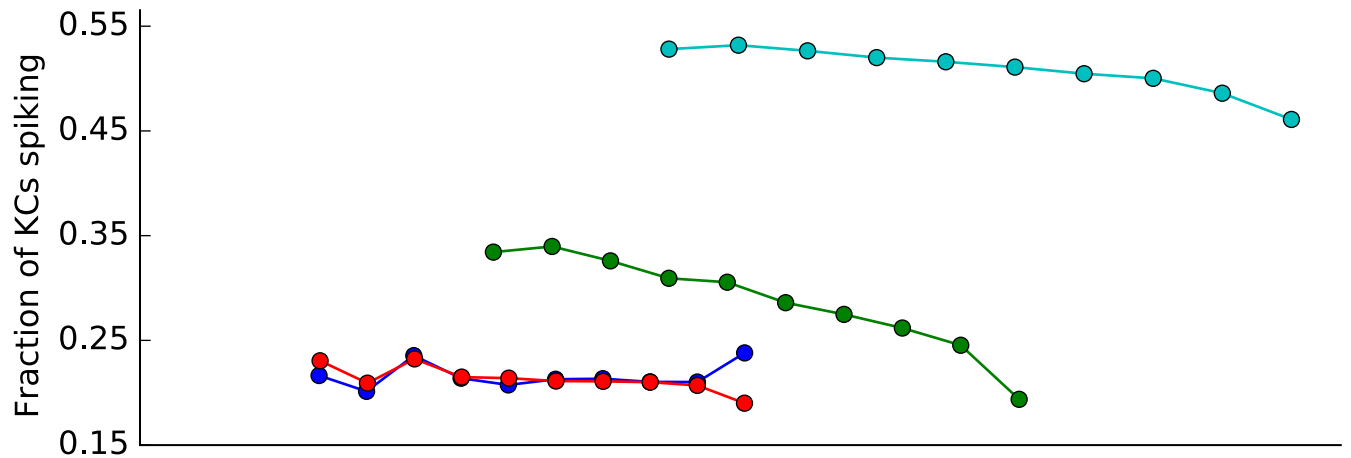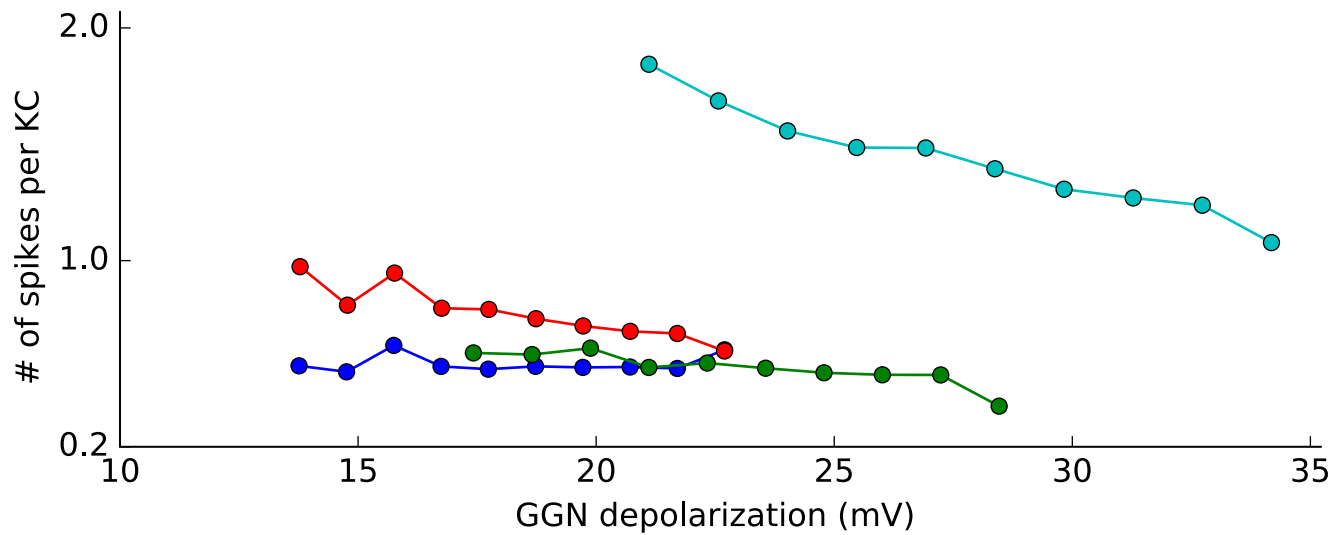

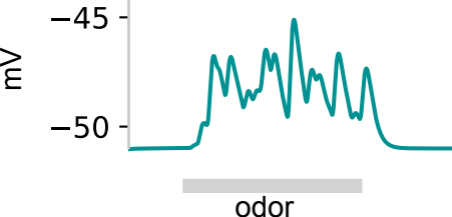

Source: http://biorxiv.org/content/10.1101/624528v1.full.pdf
